# Supplementary material for: Weight perceptions in older adults: findings from the English Longitudinal Study of Ageing
Source: PubMed Central journal article supplement (PMC7044993; doi:10.1136/bmjopen-2019-033773), 2020-02-09
Supplement: bmjopen-2019-033773.draft_revisions.pdf [file bmjopen-2019-033773.draft_revisions.pdf]

# BMJ Open

BMJ Open is committed to open peer review. As part of this commitment we make the peer review history of every article we publish publicly available.

When an article is published we post the peer reviewers' comments and the authors' responses online. We also post the versions of the paper that were used during peer review. These are the versions that the peer review comments apply to.

The versions of the paper that follow are the versions that were submitted during the peer review process. They are not the versions of record or the final published versions. They should not be cited or distributed as the published version of this manuscript.

BMJ Open is an open access journal and the full, final, typeset and author-corrected version of record of the manuscript is available on our site with no access controls, subscription charges or pay-per-view fees (<http://bmjopen.bmj.com>).

If you have any questions on BMJ Open's open peer review process please email [info.bmjopen@bmj.com](mailto:info.bmjopen@bmj.com)

# BMJ Open

## Time to reconsider body mass index for defining weight status in old age? Insights from older adults' own perceptions of weight status

|                               |                                                                                                                                                                                                                                                  |
|-------------------------------|--------------------------------------------------------------------------------------------------------------------------------------------------------------------------------------------------------------------------------------------------|
| Journal:                      | <i>BMJ Open</i>                                                                                                                                                                                                                                  |
| Manuscript ID                 | bmjopen-2019-033773                                                                                                                                                                                                                              |
| Article Type:                 | Original research                                                                                                                                                                                                                                |
| Date Submitted by the Author: | 26-Aug-2019                                                                                                                                                                                                                                      |
| Complete List of Authors:     | Jackson, Sarah ; University College London, Behavioural Science and Health<br>Smith, Lee; Anglia Ruskin University - Cambridge Campus, Department of Life Sciences<br>Steptoe, Andrew; University College London, Epidemiology and Public Health |
| Keywords:                     | GERIATRIC MEDICINE, PUBLIC HEALTH, EPIDEMIOLOGY                                                                                                                                                                                                  |
|                               |                                                                                                                                                                                                                                                  |

SCHOLARONE™  
Manuscripts

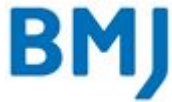

I, the Submitting Author has the right to grant and does grant on behalf of all authors of the Work (as defined in the below author licence), an exclusive licence and/or a non-exclusive licence for contributions from authors who are: i) UK Crown employees; ii) where BMJ has agreed a CC-BY licence shall apply, and/or iii) in accordance with the terms applicable for US Federal Government officers or employees acting as part of their official duties; on a worldwide, perpetual, irrevocable, royalty-free basis to BMJ Publishing Group Ltd ("BMJ") its licensees and where the relevant Journal is co-owned by BMJ to the co-owners of the Journal, to publish the Work in this journal and any other BMJ products and to exploit all rights, as set out in our [licence](#).

The Submitting Author accepts and understands that any supply made under these terms is made by BMJ to the Submitting Author unless you are acting as an employee on behalf of your employer or a postgraduate student of an affiliated institution which is paying any applicable article publishing charge ("APC") for Open Access articles. Where the Submitting Author wishes to make the Work available on an Open Access basis (and intends to pay the relevant APC), the terms of reuse of such Open Access shall be governed by a Creative Commons licence – details of these licences and which [Creative Commons](#) licence will apply to this Work are set out in our licence referred to above.

Other than as permitted in any relevant BMJ Author's Self Archiving Policies, I confirm this Work has not been accepted for publication elsewhere, is not being considered for publication elsewhere and does not duplicate material already published. I confirm all authors consent to publication of this Work and authorise the granting of this licence.

1  
2  
3  
4  
5 **Time to reconsider body mass index for defining weight status in old age?**  
6  
7 **Insights from older adults' own perceptions of weight status**  
8  
9

10  
11  
12 **Sarah E. Jackson<sup>1</sup>, Lee Smith<sup>2</sup>, Andrew Steptoe<sup>1</sup>**  
13

14  
15  
16 <sup>1</sup>Department of Behavioural Science and Health, University College London, London, UK  
17

18  
19 <sup>2</sup>Cambridge Centre for Sport and Exercise Sciences, Anglia Ruskin University, Cambridge, UK  
20  
21  
22  
23

24 **Corresponding author:** Sarah E Jackson, PhD. Department of Behavioural Science and Health, University  
25 College London, 1-19 Torrington Place, London WC1E 6BT  
26

27 Tel: (44) 207 679 3179

28 Fax: (44) 207 916 8354

29 s.e.jackson@ucl.ac.uk  
30  
31  
32  
33

34 **Word count:** 3,465  
35  
36  
37  
38  
39  
40  
41  
42  
43  
44  
45  
46  
47  
48  
49  
50  
51  
52  
53  
54  
55  
56  
57  
58  
59  
60

## Abstract

**Objectives:** Questions have been raised about the appropriateness of conventional body mass index (BMI) cut-offs for defining weight status in later life given evidence of lack of sensitivity in classifying overweight and undernutrition. This study aimed to explore weight perceptions in a large, nationally-representative sample of older adults, and the extent to which they differ according to age and perceived health status.

**Setting:** England.

**Participants:** 5,240 older adults ( $\geq 50$ y) participating in the English Longitudinal Study of Ageing (2016/17).

**Main outcome measures:** Weight perception was self-reported as too heavy, too light, or about right.

**Results:** The majority of older adults endorsed a weight perception that matched their (objectively measured) BMI classification. However, one in ten (9.9%) older adults classified by BMI as normal-weight ( $18.5$ - $24.9$ kg/m<sup>2</sup>) felt too light, with women at the upper end of the older age spectrum (OR=1.04, 95%CI=1.01-1.09), and men (OR=3.70, 95%CI=1.88-7.28) and women (OR=2.61, 95%CI=1.27-5.35) in poorer health more likely to do so. Almost half (44.8%) of older adults classified as overweight ( $25$ - $29.9$ kg/m<sup>2</sup>) and one in ten (10.3%) classified as obese ( $\geq 30$ kg/m<sup>2</sup>) felt about the right weight, with this observed more frequently among men and women at the upper end of the older age spectrum (OR range 1.04-1.06).

**Conclusion:** Older adults' perceptions of their own weight generally correspond with traditional BMI cut-offs for normal-weight, overweight, and obesity. However, a substantial minority 'underestimate' their weight status, with those at the upper end of the age spectrum and those in poorer health more likely to do so. These findings add further weight to questions raised about the appropriateness of standard definitions of overweight and obesity for older adults and calls to consider development of age-specific recommendations for healthy weight.

**Key words:** body mass index; weight perceptions; population-based study; obesity paradox

## Strengths and limitations of the study

Data were from a large, representative sample of older adults in England.

Height and weight were objectively measured for calculation of body mass index.

However, there was a substantial amount of missing data, so findings may not generalise to the entire population.

If those who were more concerned about their weight were more likely to decline to be measured, our results may underestimate the proportion of older adults across all weight groups who consider themselves to be too heavy.

## Introduction

The global obesity epidemic and ageing population are major public health concerns. With excess weight becoming increasingly 'normal', public perceptions of what constitutes a healthy body weight have become more inaccurate over time, with increasing numbers perceiving a body mass index (BMI) in the overweight or obese range ( $\geq 25$  kg/m<sup>2</sup>) to be 'about right'<sup>1</sup>. The numbers of older adults with overweight (BMI 25-29.9 kg/m<sup>2</sup>) and obesity (BMI  $\geq 30$  kg/m<sup>2</sup>) are rising rapidly, due to concurrent increases in the number of adults who reach older age and the proportion who carry excess weight<sup>2-4</sup>. However, there is controversy over the appropriateness of conventional BMI cut-offs for defining weight status in later life<sup>5-9</sup> because of their low sensitivity in identifying older adults at risk of undernutrition<sup>5</sup> or obesity<sup>6,8</sup>, and paradoxical evidence of increased survival<sup>9</sup> and better functional status<sup>10</sup> among older people with an overweight compared with normal-weight (18.5-24.9 kg/m<sup>2</sup>) BMI. Understanding how older adults perceive their own weight status, and the extent to which this is influenced by their age and health status, is important for gaining insight into this so-called age-associated 'obesity paradox'<sup>9,11,12</sup> from a patient perspective and informing targeted recommendations and interventions to promote healthy weight in later life.

Older adults' weight perceptions may be influenced by several social and physiological factors. On a societal level, there are strong preferences for slimness in women and lean muscularity in men<sup>13</sup>. Some evidence suggests that older people may be less influenced by, and feel less pressure to attain, cultural body weight ideals<sup>14,15</sup>. Nonetheless, body dissatisfaction is evident in mid- and later life<sup>16-20</sup> and may even increase as age-related changes in body composition widen the discrepancy between ideal and actual body image<sup>21</sup>. Ageing is associated with an increase in fat mass, loss of lean muscle mass, and redistribution of adipose tissue to the abdominal region<sup>22</sup>; changes that may occur without concomitant changes in body weight and BMI<sup>23</sup>.

While few previous studies have examined older adults' weight perceptions, those that have indicate age-related changes in perceptions of body weight in relation to actual BMI category. For example, in a sample of adult Korean women ( $n=8,906$ , age 20-79 years), older women were more likely than younger women to underestimate their weight status relative to their actual BMI category (50.7% of 70-79 year olds vs. 12.6% of 20-29 year olds) and less likely to overestimate their weight status (7.4% vs. 18.7%, respectively)<sup>24</sup>. Similarly, in a study of older Dutch men and women ( $n=1,295$ , age 60-96 years), the proportion of women who underestimated their weight increased with age (OR=2.97, 95% CI 1.59-5.57 for 80-96 year olds vs. 60-69 year olds), although no such pattern was found for men<sup>25</sup>. However, it was not clear from these studies

1  
2  
3 whether these differences are driven by differences in health status between older and younger people, as  
4 might be expected by evidence related to the obesity paradox. If underestimation of body weight is more  
5 pronounced for those who perceive their health to be poor, it would suggest that the optimal BMI for older  
6 people may be higher than for younger adults and further call into question the suitability of existing BMI  
7 cut-offs to define weight status in later life.  
8  
9  
10

11  
12 The present study therefore aimed to explore perceptions of weight in a large, nationally-representative  
13 sample of older adults living in England, and the extent to which they differ according to age and perceived  
14 health status.  
15  
16  
17  
18  
19  
20

## 21 **Method**

### 22 **Study population**

23  
24  
25 Data were from the English Longitudinal Study of Ageing (ELSA), a panel study of men and women aged  $\geq 50$   
26 years living in England. Full details of the study's sampling procedure and methods are available elsewhere  
27 <sup>26</sup>. The present analyses use data collected in the eighth wave of ELSA (collected 2016/17), as this is the only  
28 wave in which weight perceptions have been assessed. Of the 8,445 participants interviewed, 5,240 (62.0%)  
29 had complete data on all variables of interest and comprised our analytic sample.  
30  
31  
32  
33  
34  
35

### 36 **Measures**

#### 37 *Weight perception*

38  
39 Weight perception was assessed with the question "*Given your age and height, would you say that you are*  
40 *about the right weight, too heavy, or too light?*".  
41  
42  
43  
44

#### 45 *Anthropometric data*

46  
47 Weight was measured by nurses to the nearest 0.1 kg using portable electronic scales. Height was measured  
48 in Wave 6 (it was not included in the Wave 8 assessment) to the nearest millimetre using a portable  
49 stadiometer. Nurses recorded any factors that might have compromised the reliability of the measurements  
50 (e.g. participant was stooped/unwilling to remove shoes) and these cases were excluded. BMI was  
51 calculated as weight in kilograms divided by the square of height in metres, and categorised as underweight  
52  
53  
54  
55  
56  
57  
58  
59  
60



( $<18.5$  kg/m<sup>2</sup>), normal-weight (18.5 to  $<25$  kg/m<sup>2</sup>), overweight (25 to  $<30$  kg/m<sup>2</sup>) and obese ( $\geq 30$  kg/m<sup>2</sup>). We excluded participants with a BMI in the underweight range because there were insufficient numbers for meaningful analysis as a separate group ( $n=64$ , 1.2% of otherwise eligible sample).

For some descriptive analyses, normal-weight participants were divided into those with a BMI in the lower half of the normal-weight range (BMI 18.5 to  $<21.75$  kg/m<sup>2</sup>; 'lower normal-weight') and those in the upper half (BMI 21.75 to  $<30$  kg/m<sup>2</sup>; 'upper normal-weight').

### *Sociodemographic information*

Information on age, sex, ethnicity (white vs. non-white), and SES was recorded. SES was indexed using the short version of the NSSEC 3-category classification of the present or most recent occupation and categorised as higher (managerial/professional occupations), intermediate (intermediate occupations), and lower (routine/manual occupations)<sup>27</sup>.

### *Perceived health and comorbidities*

Self-rated health was assessed using a single item: "Would you say your health is... poor/fair/good/very good/excellent?" We analysed the proportion of individuals rating their health as fair/poor, as is commonly done in analyses of this variable<sup>28-30</sup>.

Information about five doctor-diagnosed chronic diseases that may cause weight loss (cancer, stroke, chronic lung disease, diabetes, and arthritis) was self-reported and the number of reported conditions were summed to create a chronic health condition index ranging from 0-5. Because scores were highly skewed, we dichotomised this variable to distinguish between 0 and  $\geq 1$  health conditions.

### **Statistical analysis**

Analyses were performed using IBM SPSS Statistics 24. In order to produce representative estimates for older adults in the English population, data were weighted to correct for sampling probabilities and to match the English population on age and sex. The weights accounted for the differential probability of being included in Wave 8 of ELSA.

Analyses were performed separately for men and women. We tested sex differences in sociodemographic, anthropometric, self-rated health, and weight perception variables using *t*-tests for continuous variables and Pearson's chi-square analyses for categorical variables. We used multivariable logistic regression to

1  
2  
3 identify independent associations with perception of weight as (i) 'too heavy' or (ii) 'too light' among  
4 normal-weight participants, and associations with perception of weight as 'about right' among overweight  
5 and obese participants. Variables included in the models were age, ethnicity, SES, self-rated health, and  
6 BMI. In order to evaluate whether perception of weight as too light among normal-weight participants was  
7 associated with health conditions that may cause weight loss, we also adjusted for chronic health conditions  
8 in this model. Results are reported as odds ratios (ORs) with 95% confidence intervals (CIs).  
9  
10  
11  
12

### 13 14 **Patient and public involvement**

15 Patients and the public were not involved in this research.  
16  
17  
18  
19  
20  
21

### 22 **Results**

23  
24 There were 2,363 men and 2,911 women in the sample. Descriptive characteristics overall and by sex are  
25 shown in Table 1. The mean age was 70.0 (SD 7.8) years. The majority of participants were white (96.2%)  
26 and rated their health as good, very good, or excellent (72.7%) despite many having one or more chronic  
27 health conditions (58.0%). There was fairly even distribution across socioeconomic groups (32.4% higher  
28 SES, 26.8% intermediate SES, 40.8% lower SES), although women were less likely than men to be in the  
29 higher SES group (26.6% vs. 38.8%,  $p<0.001$ ). Just over a quarter (27.5%) of participants had a BMI in the  
30 normal-weight range, 40.3% were overweight, and a further 32.3% had obesity. On average, men were  
31 significantly taller and heavier than women ( $p<0.001$ ). While there was no significant sex difference in mean  
32 BMI ( $p=0.116$ ), men were more likely than women to have a BMI placing them in the overweight range  
33 (46.1% vs. 35.0%) while women were more likely than men to have a normal-weight (30.8% vs. 23.8%) or  
34 obese BMI (34.2% vs. 30.1%,  $p<0.001$ ).  
35  
36  
37  
38  
39  
40  
41  
42  
43

### 44 **Weight perception among normal-weight older adults**

45  
46 Figure 1 summarises the distribution of weight perceptions by sex and weight status. In the normal-weight  
47 category, the majority (80.3%) of participants thought they were about the right weight, but 9.9% thought  
48 they were too light, and 9.7% thought they were too heavy. Normal-weight women were significantly more  
49 likely than normal-weight men to consider themselves to be too heavy (12.6% vs. 5.6%,  $p<0.001$ ) and less  
50 likely to consider themselves too light (7.3% vs. 13.7%,  $p<0.001$ ).  
51  
52  
53  
54  
55  
56  
57  
58  
59  
60

1  
2  
3 Multivariable models testing independent associations of age, sex, ethnicity, SES, and BMI with perception  
4 of body weight as too heavy in normal-weight men and women are presented in Table 2 (left panel). There  
5 was a significant independent association between BMI and perception of weight as too heavy in both  
6 sexes, with each unit increase in BMI associated with 1.76 times higher odds (95% CI 1.18-2.61) of  
7 perception of weight as too heavy in men and 2.14 times higher odds (95% CI 1.69-2.72) in women. Some  
8 6.7% of men and 16.8% of women in the upper normal-weight group felt too heavy, compared with just  
9 1.1% of men and 2.5% of women in the lower normal-weight group. Older age was significantly associated  
10 with reduced odds of perception of weight as too heavy in women (OR=0.97, 95% CI 0.94-1.00) but not in  
11 men. There was no significant independent association between perception of weight as too heavy and  
12 ethnicity, SES, or self-rated health in either sex.  
13  
14  
15  
16  
17  
18  
19  
20

21 Factors independently associated with perception of body weight as too light in normal-weight men and  
22 women are shown in Table 2 (right panel). There were strong independent associations with BMI and self-  
23 rated health. In both sexes, odds of feeling too light were significantly lower among those with a higher  
24 BMI, with each unit increase in BMI associated with a 47% reduction in odds in men (OR=0.53, 95% CI 0.43-  
25 0.64) and a 53% reduction in odds in women (OR=0.47, 95% CI 0.38-0.58). Just 6.5% of men and 2.6% of  
26 women in the upper normal-weight group felt too light, compared with 43.3% of men and 17.8% of women  
27 in the lower normal-weight group. Odds of perception of weight as too light were significantly increased  
28 among participants with fair/poor self-rated health (men: OR=3.70, 95% CI 1.88-7.28; women: OR=2.61,  
29 95% CI 1.27-5.35). The presence of one or more chronic health conditions was also independently  
30 associated with increased odds of perception of weight as too light in women (OR=2.21, 95% CI 1.03-4.77)  
31 but not in men. Older age was associated with increased odds of perception of weight as too light in  
32 normal-weight women (OR=1.04, 95% CI 1.01-1.09) but not in men. Non-white ethnicity was associated  
33 with increased odds of perception of weight as too light in normal-weight men (OR=6.26, 95% CI 2.09-18.76)  
34 but not in women. There was no significant independent association with SES in either sex.  
35  
36  
37  
38  
39  
40  
41  
42  
43  
44

#### 45 **Weight perception among overweight and obese older adults**

46  
47 Among participants with a BMI in the overweight range, 54.3% thought they were too heavy, but 44.8%  
48 thought they were about the right weight and 0.9% thought they were too light. Among participants with an  
49 obese BMI, 89.4% thought they were too heavy, 10.3% thought they were about the right weight and 0.4%  
50 thought they were too light. Women with overweight were more likely than men with overweight to  
51 recognise that they were too heavy (63.4% vs. 46.7%,  $p<0.001$ ) and less likely to perceive themselves to be  
52 about the right weight (35.7% vs. 52.5%,  $p<0.001$ ). Likewise, women with obesity were more likely than men  
53  
54  
55  
56  
57  
58  
59  
60

1  
2  
3 with obesity to perceive their weight as too heavy (91.3% vs. 87.0%,  $p=0.012$ ) and less likely to perceive  
4 their weight as about right (8.5% vs. 12.4%,  $p=0.020$ ) (Figure 1).  
5  
6

7 Factors independently associated with perception of body weight as about right in men and women with  
8 overweight are summarised in Table 3. Among overweight men and women, there was a strong  
9 independent association with BMI: each unit increase in BMI was associated with 48% lower odds of  
10 perception of weight as about right in men (OR=0.52, 95% CI 0.47-0.59) and 45% lower odds in women  
11 (OR=0.55, 95% CI 0.49-0.63). Older age was also independently associated with increased odds of  
12 perception of weight as about right in both sexes (men: OR=1.04, 95% CI 1.02-1.05; women: OR=1.06, 95%  
13 CI 1.04-1.09). Non-white ethnicity was associated with increased odds of perception of weight as about  
14 right in women (OR=3.80, 95% CI 1.48-9.98) but not in men. An association with SES was also observed in  
15 women, with overweight women in the intermediate and lower SES groups significantly more likely to  
16 perceive their weight to be about right than those from the higher SES group (intermediate: OR=1.79, 95%  
17 CI 1.15-2.80; lower: OR=1.73, 95% CI 1.12-2.66). There was no significant association with SES in men. There  
18 was no significant independent association with self-rated health in either sex.  
19  
20  
21  
22  
23  
24  
25  
26  
27

28 Factors independently associated with perception of body weight as about right in men and women with  
29 obesity are shown in Table 4. Older age was significantly associated with increased odds of perception of  
30 body weight as about right in both men (OR=1.04, 95% CI 1.01-1.08) and women (OR=1.04, 95% CI 1.01-  
31 1.08). Higher BMI was associated with 24% lower odds of perception of body weight as about right in men  
32 (OR=0.76, 95% CI 0.67-0.86) but no significant association with BMI was observed in women. Non-white  
33 ethnicity was significantly associated with increased odds of perception of body weight as about right in  
34 women (OR=2.72, 95% CI 1.02-7.27) but not in men. No significant association between perception of body  
35 weight as about right and either SES or self-rated health was observed in either sex.  
36  
37  
38  
39  
40  
41  
42  
43  
44  
45

## 46 Discussion

47  
48  
49 In a large, representative sample of older adults living in England, we found that weight perceptions broadly  
50 corresponded to participants' actual weight status as defined by widely used BMI cut-offs: 80% of older  
51 adults with a BMI in the normal-weight range thought they were about the right weight, and over 50% of  
52 older adults with a BMI in the overweight range and almost 90% of those with a BMI in the obese range  
53 thought they were too heavy. However, a substantial number of older adults either under- or overestimated  
54  
55  
56  
57

1  
2  
3 their weight status relative to their BMI category. One in ten participants with a normal-weight BMI thought  
4 they were too heavy and one in ten thought they were too light. Almost half of participants with an  
5 overweight BMI thought they were about the right weight, as did one in ten of those with an obese BMI.  
6  
7

8  
9 As has been observed in previous research examining weight perceptions in younger samples <sup>1,31,32</sup>, there  
10 were systematic differences between men and women's weight perceptions. Across all BMI categories, men  
11 were consistently more likely than women to underestimate their weight status, and normal-weight women  
12 were more likely than normal-weight men to report feeling too heavy. There were also some differences in  
13 weight perceptions by ethnicity and SES, with people from non-white ethnic groups and intermediate and  
14 lower SES groups more likely to underestimate their weight status, as has been shown previously in younger  
15 samples <sup>31,32</sup>, although these differences were not consistently observed across BMI categories or sexes.  
16  
17  
18  
19  
20  
21

22 Importantly, there were also clear age-related differences in weight perceptions across all BMI categories. In  
23 men and women with an overweight or obese BMI, the odds of feeling about the right weight increased  
24 with advancing age. In women with a normal-weight BMI, the odds of feeling too light increased and the  
25 odds of feeling too heavy decreased with age, although there were no significant differences by age in men.  
26  
27 These findings are suggestive of a higher ideal weight at older ages. This is consistent with previous studies  
28 that have shown people, particularly women, tend to endorse a slightly larger and more curvaceous body  
29 shape as they get older <sup>16,33</sup>. It is possible that older people are aware that having an overweight or obese  
30 BMI is not necessarily a bad thing at older ages. Alternatively, as people get older they may give up the  
31 effort to reduce weight at higher BMIs, perhaps because other health issues become more salient for them,  
32 or because they are less interested in self-presentation and striving for a slimmer physique <sup>20</sup>.  
33  
34  
35  
36  
37  
38  
39

40 There was also a significant association between self-rated health and odds of feeling too light among men  
41 and women with a normal-weight BMI. Those who rated their health as fair or poor had around three times  
42 higher odds of feeling too light at a normal-weight BMI than those who rated their health as good, very  
43 good, or excellent. In addition, women with a normal-weight BMI who had at least one chronic condition  
44 were also more likely to consider themselves to be too light, although there was no difference in men.  
45  
46 These results could be interpreted as suggesting that the ideal weight may be higher for older adults in  
47 poorer health than for those in good health. There is a vast literature documenting an obesity paradox in  
48 chronic conditions including cardiovascular disease <sup>34</sup>, cancer <sup>35</sup>, kidney disease <sup>36</sup>, and lung disease <sup>37</sup>,  
49 whereby patients who carry excess weight have better outcomes than those with a normal-weight BMI. It  
50 has also been suggested that stress related to negative body image perception may have a causal role in the  
51  
52  
53  
54  
55  
56  
57  
58  
59  
60

1  
2  
3 development of poor health<sup>38</sup>. However, weight perceptions did not differ significantly by self-rated health  
4 among participants with a BMI in the overweight or obese range, indicating that older people with poor  
5 health were no more likely to feel they were about the right weight at an overweight or obese BMI than  
6 those in good health, so any influence of health status on ideal weight appears to be restricted to the lower  
7 end of the weight spectrum. An alternative explanation is that the association between poorer self-rated  
8 health and increased likelihood of feeling too light might be secondary to illness. Older people with serious  
9 chronic illnesses often lose weight, so the fact they think they are too light might be a reflection of this  
10 concern.

11  
12 Taken together, these findings are consistent with previous literature that has questioned the use of  
13 conventional BMI definitions of weight status in older populations<sup>5-9</sup>. If standard BMI cut-offs do not  
14 accurately predict health risks or survival at older ages, and older people are increasingly likely as they get  
15 older to consider themselves too light at a 'normal-weight' BMI and 'about right' at an overweight BMI,  
16 there is a need to consider to how useful these thresholds are for categorising weight status in this age  
17 group. A mismatch between the standard BMI cut-offs and the optimal weight range for health also has  
18 implications for recommendations on healthy weight. Currently, guidance issued by official bodies such as  
19 the UK National Health Service<sup>39</sup> and US Centers for Disease Control and Prevention<sup>40</sup> does not differ  
20 according to age group or health status. However, many health professionals are reluctant to recommend  
21 weight loss for older patients with an overweight BMI<sup>41,42</sup> and there have been calls to reconsider the  
22 standards for ideal weight at older ages and develop age-specific recommendations<sup>43-45</sup>. The present  
23 results provide further support for this, demonstrating clear changes in older adults' perceptions of their  
24 weight as they get older, with an increasing sense of feeling too light at a normal-weight BMI and about the  
25 right weight at an overweight BMI with advancing age.

26  
27 Strengths of the present study include a large, representative sample of older adults in England and  
28 objective measurements of height and weight. However, findings should be considered in the light of  
29 several limitations. There was a substantial amount of missing data, so findings may not generalise to the  
30 entire population. Of note, weight measurements were not available for all Wave 8 participants (8%  
31 missing). If those who were more concerned about their weight were more likely to decline to be measured,  
32 our results may underestimate the proportion of older adults across all weight groups who consider  
33 themselves to be too heavy.

1  
2  
3 In conclusion, the present results indicate that older adults' perceptions of their own weight generally  
4 correspond with traditional BMI cut-offs for normal-weight, overweight, and obesity. However, a substantial  
5 minority 'underestimate' their weight status, with those at the upper end of the age spectrum and those in  
6 poorer health more likely to do so. These findings add further weight to questions raised about the  
7 appropriateness of standard definitions of overweight and obesity for older adults and calls to consider  
8 development of age-specific recommendations for healthy weight.  
9  
10  
11  
12  
13  
14  
15  
16  
17  
18  
19  
20  
21  
22  
23  
24  
25  
26  
27  
28  
29  
30  
31  
32  
33  
34  
35  
36  
37  
38  
39  
40  
41  
42  
43  
44  
45  
46  
47  
48  
49  
50  
51  
52  
53  
54  
55  
56  
57  
58  
59  
60

For peer review only

## References

1. Johnson F, Cooke L, Croker H, Wardle J. Changing perceptions of weight in Great Britain: comparison of two population surveys. *BMJ*. 2008;337(jul10 1):a494-a494. doi:10.1136/bmj.a494
2. Vincent GK, Velkoff VA. *The next Four Decades: The Older Population in the United States: 2010 to 2050*. US Department of Commerce, Economics and Statistics Administration, US Census Bureau; 2010.
3. Wang YC, McPherson K, Marsh T, Gortmaker SL, Brown M. Health and economic burden of the projected obesity trends in the USA and the UK. *The Lancet*. 2011;378(9793):815-825. doi:10.1016/S0140-6736(11)60814-3
4. Villareal DT, Apovian CM, Kushner RF, Klein S. Obesity in Older Adults: Technical Review and Position Statement of the American Society for Nutrition and NAASO, The Obesity Society. *Obes Res*. 2005;13(11):1849-1863. doi:10.1038/oby.2005.228
5. Beck AM, Ovesen L. At which body mass index and degree of weight loss should hospitalized elderly patients be considered at nutritional risk? *Clin Nutr Edinb Scotl*. 1998;17(5):195-198.
6. Sardinha LB, Teixeira PJ. Obesity screening in older women with the body mass index: A receiver operating characteristic (ROC) analysis. *Sci Sports*. 2000;15(4):212-219. doi:10.1016/S0765-1597(00)80008-8
7. Cook Z, Kirk S, Lawrenson S, Sandford S. Use of BMI in the assessment of undernutrition in older subjects: reflecting on practice. *Proc Nutr Soc*. 2005;64(3):313-317. doi:10.1079/PNS2005437
8. Vasconcelos F de AG de, Cordeiro BA, Rech CR, Petroski EL. Sensitivity and specificity of the body mass index for the diagnosis of overweight/obesity in elderly. *Cad Saúde Pública*. 2010;26:1519-1527. doi:10.1590/S0102-311X2010000800006
9. Oreopoulos A, Kalantar-Zadeh K, Sharma AM, Fonarow GC. The Obesity Paradox in the Elderly: Potential Mechanisms and Clinical Implications. *Clin Geriatr Med*. 2009;25(4):643-659. doi:10.1016/j.cger.2009.07.005
10. Bahat G, Tufan F, Saka B, et al. Which body mass index (BMI) is better in the elderly for functional status? *Arch Gerontol Geriatr*. 2012;54(1):78-81. doi:10.1016/j.archger.2011.04.019
11. Wang S, Ren J. Obesity Paradox in Aging: From Prevalence to Pathophysiology. *Prog Cardiovasc Dis*. 2018;61(2):182-189. doi:10.1016/j.pcad.2018.07.011
12. Chapman IM. Obesity paradox during aging. *Interdiscip Top Gerontol*. 2010;37:20-36. doi:10.1159/000319992
13. Swami V. Cultural Influences on Body Size Ideals. *Eur Psychol*. 2015;20(1):44-51. doi:10.1027/1016-9040/a000150



14. Bedford JL, Johnson CS. Societal Influences on Body Image Dissatisfaction in Younger and Older Women. *J Women Aging*. 2006;18(1):41-55. doi:10.1300/J074v18n01\_04
15. Dunkel TM, Davidson D, Qurashi S. Body satisfaction and pressure to be thin in younger and older Muslim and non-Muslim women: The role of Western and non-Western dress preferences. *Body Image*. 2010;7(1):56-65. doi:10.1016/j.bodyim.2009.10.003
16. Tiggemann M. Body image across the adult life span: stability and change. *Body Image*. 2004;1(1):29-41. doi:10.1016/S1740-1445(03)00002-0
17. Webster J, Tiggemann M. The Relationship Between Women's Body Satisfaction and Self-Image Across the Life Span: The Role of Cognitive Control. *J Genet Psychol*. 2003;164(2):241-252. doi:10.1080/00221320309597980
18. Lamb CS, Jackson LA, Cassiday PB, Priest DJ. Body figure preferences of men and women: A comparison of two generations. *Sex Roles*. 1993;28(5-6):345-358. doi:10.1007/BF00289890
19. Rozin P, Fallon A. Body image, attitudes to weight, and misperceptions of figure preferences of the opposite sex: a comparison of men and women in two generations. *J Abnorm Psychol*. 1988;97(3):342-345.
20. Jackson SE, Holter L, Beeken RJ. 'Just because I'm old it doesn't mean I have to be fat': a qualitative study exploring older adults' views and experiences of weight management. *BMJ Open*. 2019;9(2):e025680. doi:10.1136/bmjopen-2018-025680
21. Tiggemann M. Body-size dissatisfaction: Individual differences in age and gender, and relationship with self-esteem. *Personal Individ Differ*. 1992;13(1):39-43. doi:10.1016/0191-8869(92)90215-B
22. St-Onge M-P, Gallagher D. Body composition changes with aging: The cause or the result of alterations in metabolic rate and macronutrient oxidation? *Nutr Burbank Los Angel Cty Calif*. 2010;26(2):152-155. doi:10.1016/j.nut.2009.07.004
23. St-Onge M-P. Relationship between body composition changes and changes in physical function and metabolic risk factors in aging. *Curr Opin Clin Nutr Metab Care*. 2005;8(5):523-528.
24. Park B, Cho HN, Choi E, et al. Self-perceptions of body weight status according to age-groups among Korean women: A nationwide population-based survey. *PLOS ONE*. 2019;14(1):e0210486. doi:10.1371/journal.pone.0210486
25. Monteagudo Sánchez C, Dijkstra SC, Visser M. Self-perception of body weight status in older Dutch adults. *J Nutr Health Aging*. 2015;19(6):612-618. doi:10.1007/s12603-015-0486-z
26. Steptoe A, Breeze E, Banks J, Nazroo J. Cohort profile: the English Longitudinal Study of Ageing. *Int J Epidemiol*. 2013;42(6):1640-1648. doi:10.1093/ije/dys168
27. Rose D, Pevalin DJ. *A Researcher's Guide to the National Statistics Socio-Economic Classification*. SAGE Publications Ltd; 2003.

- 1
  - 2
  - 3
  - 4
  - 5
  - 6
  - 7
  - 8
  - 9
  - 10
  - 11
  - 12
  - 13
  - 14
  - 15
  - 16
  - 17
  - 18
  - 19
  - 20
  - 21
  - 22
  - 23
  - 24
  - 25
  - 26
  - 27
  - 28
  - 29
  - 30
  - 31
  - 32
  - 33
  - 34
  - 35
  - 36
  - 37
  - 38
  - 39
  - 40
  - 41
  - 42
  - 43
  - 44
  - 45
  - 46
  - 47
  - 48
  - 49
  - 50
  - 51
  - 52
  - 53
  - 54
  - 55
  - 56
  - 57
  - 58
  - 59
  - 60
28. Steptoe A, Jackson SE. The Life Skills of Older Americans: Association with Economic, Psychological, Social, and Health Outcomes. *Sci Rep*. 2018;8(1):9669. doi:10.1038/s41598-018-27909-w
29. DeSalvo KB, Bloser N, Reynolds K, He J, Muntner P. Mortality prediction with a single general self-rated health question. A meta-analysis. *J Gen Intern Med*. 2006;21(3):267-275. doi:10.1111/j.1525-1497.2005.00291.x
30. Jackson SE, Hackett RA, Steptoe A. Associations between age discrimination and health and wellbeing: cross-sectional and prospective analysis of the English Longitudinal Study of Ageing. *Lancet Public Health*. 2019;in press.
31. Jackson SE, Johnson F, Croker H, Wardle J. Weight perceptions in a population sample of English adolescents: cause for celebration or concern? *Int J Obes*. 2015;39(10):1488-1493. doi:10.1038/ijo.2015.126
32. Yaemsiri S, Slining MM, Agarwal SK. Perceived weight status, overweight diagnosis, and weight control among US adults: the NHANES 2003–2008 Study. *Int J Obes*. 2011;35(8):1063-1070. doi:10.1038/ijo.2010.229
33. Clarke LCH. Beauty in Later Life: Older Women’s Perceptions of Physical Attractiveness. *Can J Aging Rev Can Vieil*. 2002;21(3):429-442. doi:10.1017/S0714980800001744
34. Lavie CJ, Milani RV, Ventura HO. Obesity and the “Obesity Paradox” in Cardiovascular Diseases. *Clin Pharmacol Ther*. 2011;90(1):23-25. doi:10.1038/clpt.2011.87
35. Lennon H, Sperrin M, Badrick E, Renehan AG. The Obesity Paradox in Cancer: a Review. *Curr Oncol Rep*. 2016;18(9):56. doi:10.1007/s11912-016-0539-4
36. Park J, Ahmadi S-F, Streja E, et al. Obesity Paradox in End-Stage Kidney Disease Patients. *Prog Cardiovasc Dis*. 2014;56(4):415-425. doi:10.1016/j.pcad.2013.10.005
37. Chittal P, Babu AS, Lavie CJ. Obesity Paradox: Does Fat Alter Outcomes in Chronic Obstructive Pulmonary Disease? *COPD J Chronic Obstr Pulm Dis*. 2015;12(1):14-18. doi:10.3109/15412555.2014.915934
38. Muennig P, Jia H, Lee R, Lubetkin E. I Think Therefore I Am: Perceived Ideal Weight as a Determinant of Health. *Am J Public Health*. 2008;98(3):501-506. doi:10.2105/AJPH.2007.114769
39. NHS Digital. Healthy weight. nhs.uk. <https://www.nhs.uk/live-well/healthy-weight/>. Published March 17, 2019. Accessed March 17, 2019.
40. Centers for Disease Control and Prevention. Assessing Your Weight | Healthy Weight. <https://www.cdc.gov/healthyweight/assessing/index.html>. Published March 6, 2019. Accessed March 17, 2019.
41. Houston DK, Nicklas BJ, Zizza CA. Weighty Concerns: The Growing Prevalence of Obesity among Older Adults. *J Am Diet Assoc*. 2009;109(11):1886-1895. doi:10.1016/j.jada.2009.08.014

- 1  
2  
3 42. Sommers A. U.S. Congressional Research Service: obesity among older Americans. 2011.  
4 [http://www.legistorm.com/score\\_crs/show/id/104646.html](http://www.legistorm.com/score_crs/show/id/104646.html). Accessed April 18, 2013.  
5  
6 43. Andres R, Elahi D, Tobin JD, Muller DC, Brant L. Impact of age on weight goals. *Ann Intern Med*.  
7 1985;103(6 ( Pt 2)):1030-1033.  
8  
9 44. Heiat A. Impact of Age on Definition of Standards for Ideal Weight. *Prev Cardiol*. 2003;6(2):104-107.  
10 doi:10.1111/j.1520-037X.2003.01046.x  
11  
12 45. DeCaria JE, Sharp C, Petrella RJ. Scoping review report: obesity in older adults. *Int J Obes*. March 2012.  
13 doi:10.1038/ijo.2012.29  
14  
15  
16  
17  
18  
19  
20  
21  
22  
23  
24  
25  
26  
27  
28  
29  
30  
31  
32  
33  
34  
35  
36  
37  
38  
39  
40  
41  
42  
43  
44  
45  
46  
47  
48  
49  
50  
51  
52  
53  
54  
55  
56  
57  
58  
59  
60

For peer review only

## Funding

This work was supported by Cancer Research UK (C1417/A22962) and the ESRC (ES/R005990/1). The funders had no final role in the study design; in the collection, analysis and interpretation of data; in the writing of the report; or in the decision to submit the paper for publication. All researchers listed as authors are independent from the funders and all final decisions about the research were taken by the investigators and were unrestricted. All authors had full access to all of the data (including statistical reports and tables) in the study and can take responsibility for the integrity of the data and the accuracy of the data analysis.

For peer review only

## **Acknowledgments**

### **Authors' contributions**

SEJ analysed the data and drafted the manuscript. All authors provided critical revisions and approved the final manuscript.

### **Availability of data and materials**

The datasets used and/or analysed during the current study are available from the corresponding author on reasonable request.

### **Competing interests**

None.

## Tables

**Table 1** Sample demographic and anthropometric characteristics

|                                    | <b>Whole sample<br/>(n=5240)</b> | <b>Men<br/>(n=2352)</b> | <b>Women<br/>(n=2888)</b> | <b>p*</b> |
|------------------------------------|----------------------------------|-------------------------|---------------------------|-----------|
| Age (mean [SD] years)              | 70.07 (7.76)                     | 70.23 (7.52)            | 70.57 (7.71)              | 0.117     |
| Ethnicity                          |                                  |                         |                           |           |
| White                              | 96.2                             | 95.8                    | 96.6                      | 0.163     |
| Non-white                          | 3.8                              | 4.2                     | 3.4                       | -         |
| SES                                |                                  |                         |                           |           |
| Higher                             | 32.4                             | 38.8                    | 26.6                      | <0.001    |
| Intermediate                       | 26.8                             | 21.9                    | 31.3                      | -         |
| Lower                              | 40.8                             | 39.4                    | 42.2                      | -         |
| Self-rated health                  |                                  |                         |                           |           |
| Good/very good/excellent           | 72.7                             | 72.5                    | 72.9                      | 0.790     |
| Fair/poor                          | 27.3                             | 27.5                    | 27.1                      | -         |
| Chronic health conditions          |                                  |                         |                           |           |
| None                               | 42.0                             | 46.2                    | 38.1                      | <0.001    |
| ≥1                                 | 58.0                             | 53.8                    | 61.9                      | -         |
| Height (mean [SD] cm)              | 166.31 (9.44)                    | 173.10 (6.90)           | 160.01 (6.66)             | <0.001    |
| Weight (mean [SD] kg)              | 78.64 (16.35)                    | 84.59 (15.04)           | 72.81 (15.29)             | <0.001    |
| BMI (mean [SD] kg/m <sup>2</sup> ) | 28.39 (5.28)                     | 28.21 (4.61)            | 28.45 (5.76)              | 0.116     |
| Weight status                      |                                  |                         |                           |           |
| Normal-weight                      | 27.5                             | 23.8                    | 30.8                      | <0.001    |
| Lower normal-weight                | 7.1                              | 4.7                     | 9.2                       | -         |
| Upper normal-weight                | 20.4                             | 19.1                    | 21.5                      | -         |
| Overweight                         | 40.3                             | 46.1                    | 35.0                      | -         |
| Obese                              | 32.3                             | 30.1                    | 34.2                      | -         |

Weighted means and proportions are shown. Sample sizes (*n*) are shown unweighted.

\**p* values are for the association between each variable and sex.

SD = standard deviation; SES = socioeconomic status; BMI = body mass index.

**Table 2** Multivariable models testing associations with feeling ‘too heavy’ and ‘too light’ among normal-weight older men and women

|                           | Too heavy   |                  |       |               |                  |        | Too light   |                   |        |               |                   |        |
|---------------------------|-------------|------------------|-------|---------------|------------------|--------|-------------|-------------------|--------|---------------|-------------------|--------|
|                           | Men (n=581) |                  |       | Women (n=917) |                  |        | Men (n=581) |                   |        | Women (n=917) |                   |        |
|                           | %*          | OR [95% CI]      | p     | %*            | OR [95% CI]      | p      | %*          | OR [95% CI]       | p      | %*            | OR [95% CI]       | p      |
| Age (years)               | -           | 1.01 [0.96-1.06] | 0.717 | -             | 0.97 [0.94-1.00] | 0.049  | -           | 1.01 [0.97-1.05]  | 0.745  | -             | 1.04 [1.00-1.09]  | 0.042  |
| Ethnicity                 |             |                  |       |               |                  |        |             |                   |        |               |                   |        |
| White                     | 5.7         | 1.00             | -     | 12.6          | 1.00             | -      | 12.2        | 1.00              | -      | 7.1           | 1.00              | -      |
| Non-white                 | 4.8         | 0.94 [0.14-6.55] | 0.952 | 9.5           | 0.42 [0.09-1.89] | 0.258  | 42.9        | 6.26 [2.09-18.76] | 0.001  | 9.5           | 1.96 [0.36-10.82] | 0.440  |
| SES                       |             |                  |       |               |                  |        |             |                   |        |               |                   |        |
| Higher                    | 5.4         | 1.00             | -     | 11.9          | 1.00             | -      | 10.3        | 1.00              | -      | 3.7           | 1.00              | -      |
| Intermediate              | 7.8         | 1.40 [0.53-3.71] | 0.504 | 12.5          | 1.18 [0.64-2.17] | 0.605  | 10.7        | 0.84 [0.36-1.96]  | 0.689  | 9.3           | 2.26 [0.87-5.86]  | 0.093  |
| Lower                     | 5.1         | 1.03 [0.40-2.70] | 0.948 | 13.4          | 1.26 [0.69-2.31] | 0.457  | 19.7        | 1.30 [0.64-2.64]  | 0.474  | 8.9           | 2.15 [0.83-5.57]  | 0.114  |
| Self-rated health         |             |                  |       |               |                  |        |             |                   |        |               |                   |        |
| Good/very good/excellent  | 5.6         | 1.00             | -     | 13.1          | 1.00             | -      | 8.2         | 1.00              | -      | 4.8           | 1.00              | -      |
| Fair/poor                 | 5.8         | 1.17 [0.47-2.92] | 0.730 | 9.9           | 0.88 [0.45-1.72] | 0.717  | 29.2        | 3.70 [1.88-7.28]  | <0.001 | 17.6          | 2.61 [1.27-5.35]  | 0.009  |
| BMI                       | -           | 1.76 [1.18-2.61] | 0.005 | -             | 2.14 [1.69-2.72] | <0.001 | -           | 0.53 [0.43-0.64]  | <0.001 | -             | 0.47 [0.38-0.58]  | <0.001 |
| Chronic health conditions |             |                  |       |               |                  |        |             |                   |        |               |                   |        |
| None                      | -           | -                | -     | -             | -                | -      | 10.0        | 1.00              | -      | 4.3           | 1.00              | -      |
| ≥1                        | -           | -                | -     | -             | -                | -      | 17.3        | 1.07 [0.54-2.14]  | 0.840  | 10.0          | 2.21 [1.03-4.77]  | 0.043  |

\*Indicates the percentage of normal-weight participants in each group perceiving themselves to be too heavy/too light.

OR = odds ratio; CI = confidence interval; SES = socioeconomic status; BMI = body mass index.

Weighted data. Sample sizes (n) are shown unweighted.

**Table 3** Multivariable models testing associations with feeling 'about the right weight' among older men and women with overweight

|                          | Men (n=1083) |                  |        | Women (n=1052) |                  |        |
|--------------------------|--------------|------------------|--------|----------------|------------------|--------|
|                          | %*           | OR [95% CI]      | p      | %*             | OR [95% CI]      | p      |
| Age (years)              | -            | 1.04 [1.02-1.05] | <0.001 | -              | 1.06 [1.04-1.09] | <0.001 |
| Ethnicity                |              |                  |        |                |                  |        |
| White                    | 52.7         | 1.00             | -      | 34.9           | 1.00             | -      |
| Non-white                | 48.8         | 1.63 [0.82-3.26] | 0.166  | 61.9           | 3.80 [1.45-9.98] | 0.007  |
| SES                      |              |                  |        |                |                  |        |
| Higher                   | 53.5         | 1.00             | -      | 28.9           | 1.00             | -      |
| Intermediate             | 54.4         | 1.25 [0.85-1.85] | 0.258  | 37.5           | 1.79 [1.15-2.80] | 0.011  |
| Lower                    | 50.4         | 1.09 [0.78-1.52] | 0.606  | 38.1           | 1.73 [1.12-2.66] | 0.013  |
| Self-rated health        |              |                  |        |                |                  |        |
| Good/very good/excellent | 54.3         | 1.00             | -      | 34.1           | 1.00             | -      |
| Fair/poor                | 46.4         | 0.78 [0.55-1.10] | 0.160  | 40.3           | 1.29 [0.86-1.91] | 0.216  |
| BMI                      | -            | 0.52 [0.47-0.59] | <0.001 | -              | 0.55 [0.49-0.63] | <0.001 |

\*Indicates the percentage of overweight participants in each group perceiving themselves to be about the right weight or too light.

OR = odds ratio; CI = confidence interval; SES = socioeconomic status.

Weighted data. Sample sizes (n) are shown unweighted.



**Table 4** Multivariable models testing associations with feeling 'about the right weight' among older men and women with obesity

|                          | Men (n=688) |                  |        | Women (n=919) |                  |       |
|--------------------------|-------------|------------------|--------|---------------|------------------|-------|
|                          | %*          | OR [95% CI]      | p      | %*            | OR [95% CI]      | p     |
| Age (years)              | -           | 1.04 [1.01-1.08] | 0.016  | -             | 1.04 [1.01-1.08] | 0.014 |
| Ethnicity                |             |                  |        |               |                  |       |
| White                    | 12.7        | 1.00             | -      | 8.1           | 1.00             | -     |
| Non-white                | 5.3         | 0.32 [0.04-2.43] | 0.268  | 20.7          | 2.72 [1.02-7.27] | 0.046 |
| SES                      |             |                  |        |               |                  |       |
| Higher                   | 11.1        | 1.00             | -      | 8.0           | 1.00             | -     |
| Intermediate             | 11.8        | 0.95 [0.46-1.97] | 0.890  | 4.5           | 0.56 [0.23-1.34] | 0.191 |
| Lower                    | 13.8        | 1.33 [0.73-2.41] | 0.355  | 11.0          | 1.45 [0.74-2.84] | 0.282 |
| Self-rated health        |             |                  |        |               |                  |       |
| Good/very good/excellent | 13.1        | 1.00             | -      | 8.3           | 1.00             | -     |
| Fair/poor                | 11.3        | 0.93 [0.53-1.64] | 0.811  | 9.2           | 0.96 [0.54-1.68] | 0.876 |
| BMI                      | -           | 0.76 [0.67-0.86] | <0.001 | -             | 0.96 [0.90-1.03] | 0.255 |

\*Indicates the percentage of overweight participants in each group perceiving themselves to be about the right weight or too light.

OR = odds ratio; CI = confidence interval; SES = socioeconomic status.

Weighted data. Sample sizes (n) are shown unweighted.

1  
2  
3  
4  
5  
6  
7  
8  
9  
10  
11  
12  
13  
14  
15  
16  
17  
18  
19  
20  
21  
22  
23  
24  
25  
26  
27  
28  
29  
30  
31  
32  
33  
34  
35  
36  
37  
38  
39  
40  
41  
42  
43  
44  
45  
46  
47  
48  
49  
50  
51  
52  
53  
54  
55  
56  
57  
58  
59  
60

## Figure legends

**Figure 1.** The proportion (with 95% confidence interval) of men and women who reported feeling ‘too heavy’, ‘about the right weight’, and ‘too light’, by measured weight status. Weighted data shown.

For peer review only

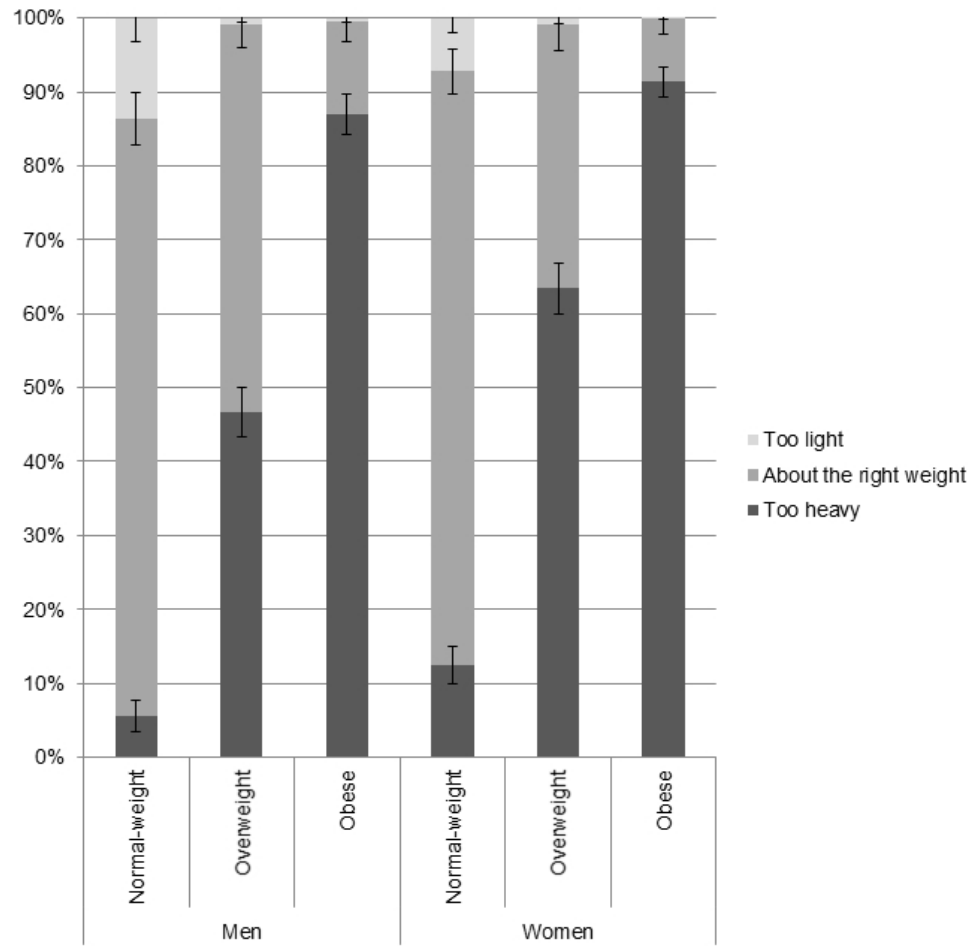

Figure 1. The proportion (with 95% confidence interval) of men and women who reported feeling 'too heavy', 'about the right weight', and 'too light', by measured weight status. Weighted data shown.

177x169mm (96 x 96 DPI)

STROBE Statement—Checklist of items that should be included in reports of *cross-sectional studies*

|                              | Item No | Recommendation                                                                                                                                                                                               | Page No |
|------------------------------|---------|--------------------------------------------------------------------------------------------------------------------------------------------------------------------------------------------------------------|---------|
| <b>Title and abstract</b>    | 1       | (a) Indicate the study's design with a commonly used term in the title or the abstract                                                                                                                       | 2       |
|                              |         | (b) Provide in the abstract an informative and balanced summary of what was done and what was found                                                                                                          | 2       |
| <b>Introduction</b>          |         |                                                                                                                                                                                                              |         |
| Background/rationale         | 2       | Explain the scientific background and rationale for the investigation being reported                                                                                                                         | 4-5     |
| Objectives                   | 3       | State specific objectives, including any prespecified hypotheses                                                                                                                                             | 5       |
| <b>Methods</b>               |         |                                                                                                                                                                                                              |         |
| Study design                 | 4       | Present key elements of study design early in the paper                                                                                                                                                      | 5       |
| Setting                      | 5       | Describe the setting, locations, and relevant dates, including periods of recruitment, exposure, follow-up, and data collection                                                                              | 5       |
| Participants                 | 6       | (a) Give the eligibility criteria, and the sources and methods of selection of participants                                                                                                                  | 5       |
| Variables                    | 7       | Clearly define all outcomes, exposures, predictors, potential confounders, and effect modifiers. Give diagnostic criteria, if applicable                                                                     | 5-6     |
| Data sources/<br>measurement | 8*      | For each variable of interest, give sources of data and details of methods of assessment (measurement). Describe comparability of assessment methods if there is more than one group                         | 5-6     |
| Bias                         | 9       | Describe any efforts to address potential sources of bias                                                                                                                                                    | 6-7     |
| Study size                   | 10      | Explain how the study size was arrived at                                                                                                                                                                    | 5       |
| Quantitative variables       | 11      | Explain how quantitative variables were handled in the analyses. If applicable, describe which groupings were chosen and why                                                                                 | 5-6     |
| Statistical methods          | 12      | (a) Describe all statistical methods, including those used to control for confounding                                                                                                                        | 6-7     |
|                              |         | (b) Describe any methods used to examine subgroups and interactions                                                                                                                                          | 6-7     |
|                              |         | (c) Explain how missing data were addressed                                                                                                                                                                  | 6-7     |
|                              |         | (d) If applicable, describe analytical methods taking account of sampling strategy                                                                                                                           | 6       |
|                              |         | (e) Describe any sensitivity analyses                                                                                                                                                                        | na      |
| <b>Results</b>               |         |                                                                                                                                                                                                              |         |
| Participants                 | 13*     | (a) Report numbers of individuals at each stage of study—eg numbers potentially eligible, examined for eligibility, confirmed eligible, included in the study, completing follow-up, and analysed            | 5       |
|                              |         | (b) Give reasons for non-participation at each stage                                                                                                                                                         | Na      |
|                              |         | (c) Consider use of a flow diagram                                                                                                                                                                           | Na      |
| Descriptive data             | 14*     | (a) Give characteristics of study participants (eg demographic, clinical, social) and information on exposures and potential confounders                                                                     | 7       |
|                              |         | (b) Indicate number of participants with missing data for each variable of interest                                                                                                                          | Tables  |
| Outcome data                 | 15*     | Report numbers of outcome events or summary measures                                                                                                                                                         | Tables  |
| Main results                 | 16      | (a) Give unadjusted estimates and, if applicable, confounder-adjusted estimates and their precision (eg, 95% confidence interval). Make clear which confounders were adjusted for and why they were included | Tables  |

|                          |    |                                                                                                                                                                            |        |
|--------------------------|----|----------------------------------------------------------------------------------------------------------------------------------------------------------------------------|--------|
|                          |    | (b) Report category boundaries when continuous variables were categorized                                                                                                  | Tables |
|                          |    | (c) If relevant, consider translating estimates of relative risk into absolute risk for a meaningful time period                                                           | Na     |
| Other analyses           | 17 | Report other analyses done—eg analyses of subgroups and interactions, and sensitivity analyses                                                                             | na     |
| <b>Discussion</b>        |    |                                                                                                                                                                            |        |
| Key results              | 18 | Summarise key results with reference to study objectives                                                                                                                   | 9-10   |
| Limitations              | 19 | Discuss limitations of the study, taking into account sources of potential bias or imprecision. Discuss both direction and magnitude of any potential bias                 | 11     |
| Interpretation           | 20 | Give a cautious overall interpretation of results considering objectives, limitations, multiplicity of analyses, results from similar studies, and other relevant evidence | 11-12  |
| Generalisability         | 21 | Discuss the generalisability (external validity) of the study results                                                                                                      | 11     |
| <b>Other information</b> |    |                                                                                                                                                                            |        |
| Funding                  | 22 | Give the source of funding and the role of the funders for the present study and, if applicable, for the original study on which the present article is based              | 17     |

\*Give information separately for exposed and unexposed groups.

**Note:** An Explanation and Elaboration article discusses each checklist item and gives methodological background and published examples of transparent reporting. The STROBE checklist is best used in conjunction with this article (freely available on the Web sites of PLoS Medicine at <http://www.plosmedicine.org/>, Annals of Internal Medicine at <http://www.annals.org/>, and Epidemiology at <http://www.epidem.com/>). Information on the STROBE Initiative is available at [www.strobe-statement.org](http://www.strobe-statement.org).

# BMJ Open

## Weight perceptions in older adults: findings from the English Longitudinal Study of Ageing

|                                 |                                                                                                                                                                                                                                                   |
|---------------------------------|---------------------------------------------------------------------------------------------------------------------------------------------------------------------------------------------------------------------------------------------------|
| Journal:                        | <i>BMJ Open</i>                                                                                                                                                                                                                                   |
| Manuscript ID                   | bmjopen-2019-033773.R1                                                                                                                                                                                                                            |
| Article Type:                   | Original research                                                                                                                                                                                                                                 |
| Date Submitted by the Author:   | 11-Dec-2019                                                                                                                                                                                                                                       |
| Complete List of Authors:       | Jackson, Sarah ; University College London, Behavioural Science and Health<br>Smith, Lee; Anglia Ruskin University - Cambridge Campus, Department of Life Sciences<br>Step toe, Andrew; University College London, Epidemiology and Public Health |
| <b>Primary Subject Heading</b>: | Public health                                                                                                                                                                                                                                     |
| Secondary Subject Heading:      | Geriatric medicine                                                                                                                                                                                                                                |
| Keywords:                       | GERIATRIC MEDICINE, PUBLIC HEALTH, EPIDEMIOLOGY                                                                                                                                                                                                   |
|                                 |                                                                                                                                                                                                                                                   |

SCHOLARONE™  
Manuscripts



I, the Submitting Author has the right to grant and does grant on behalf of all authors of the Work (as defined in the below author licence), an exclusive licence and/or a non-exclusive licence for contributions from authors who are: i) UK Crown employees; ii) where BMJ has agreed a CC-BY licence shall apply, and/or iii) in accordance with the terms applicable for US Federal Government officers or employees acting as part of their official duties; on a worldwide, perpetual, irrevocable, royalty-free basis to BMJ Publishing Group Ltd ("BMJ") its licensees and where the relevant Journal is co-owned by BMJ to the co-owners of the Journal, to publish the Work in this journal and any other BMJ products and to exploit all rights, as set out in our [licence](#).

The Submitting Author accepts and understands that any supply made under these terms is made by BMJ to the Submitting Author unless you are acting as an employee on behalf of your employer or a postgraduate student of an affiliated institution which is paying any applicable article publishing charge ("APC") for Open Access articles. Where the Submitting Author wishes to make the Work available on an Open Access basis (and intends to pay the relevant APC), the terms of reuse of such Open Access shall be governed by a Creative Commons licence – details of these licences and which [Creative Commons](#) licence will apply to this Work are set out in our licence referred to above.

Other than as permitted in any relevant BMJ Author's Self Archiving Policies, I confirm this Work has not been accepted for publication elsewhere, is not being considered for publication elsewhere and does not duplicate material already published. I confirm all authors consent to publication of this Work and authorise the granting of this licence.

1  
2  
3  
4  
5 **Weight perceptions in older adults: findings from the English Longitudinal Study of**  
6  
7 **Ageing**

8  
9 **Sarah E. Jackson<sup>1</sup>, Lee Smith<sup>2</sup>, Andrew Steptoe<sup>1</sup>**

10  
11  
12  
13  
14 <sup>1</sup>Department of Behavioural Science and Health, University College London, London, UK

15  
16 <sup>2</sup>Cambridge Centre for Sport and Exercise Sciences, Anglia Ruskin University, Cambridge, UK

17  
18  
19  
20  
21 **Corresponding author:** Sarah E Jackson, PhD. Department of Behavioural Science and Health, University  
22 College London, 1-19 Torrington Place, London WC1E 6BT

23  
24 Tel: (44) 207 679 3179

25  
26 Fax: (44) 207 916 8354

27  
28 [s.e.jackson@ucl.ac.uk](mailto:s.e.jackson@ucl.ac.uk)

29  
30  
31 **Word count:** 3,465



## Abstract

**Objectives:** To explore weight perceptions in a large, nationally-representative sample of older adults, and the extent to which they differ according to age and perceived health status.

**Setting:** England.

**Participants:** 5,240 men and women ( $\geq 50$ y) participating in the English Longitudinal Study of Ageing (2016/17).

**Main outcome measures:** Weight perception was self-reported as too heavy, too light, or about right.

**Results:** The majority of older adults endorsed a weight perception that matched their (objectively measured) BMI classification. However, one in ten (9.9%) older adults classified by BMI as normal-weight (18.5-24.9kg/m<sup>2</sup>) felt too light, with women at the upper end of the older age spectrum (OR=1.04, 95%CI=1.01-1.09), and men (OR=3.70, 95%CI=1.88-7.28) and women (OR=2.61, 95%CI=1.27-5.35) in poorer health more likely to do so. Almost half (44.8%) of older adults classified as overweight (25-29.9kg/m<sup>2</sup>) and one in ten (10.3%) classified as obese ( $\geq 30$ kg/m<sup>2</sup>) felt about the right weight, with this observed more frequently among men and women at the upper end of the older age spectrum (OR range 1.04-1.06).

**Conclusion:** Older adults' perceptions of their own weight generally correspond with traditional BMI cut-offs for normal-weight, overweight, and obesity. However, a substantial minority 'underestimate' their weight status, with those at the upper end of the age spectrum and those in poorer health more likely to do so.

**Key words:** body mass index; weight perceptions; population-based study; obesity paradox

## Strengths and limitations of the study

Data were from a large, representative sample of older adults in England.

Height and weight were objectively measured for calculation of body mass index.

However, there was a substantial amount of missing data, so findings may not generalise to the entire population.

If those who were more concerned about their weight were more likely to decline to be measured, our results may underestimate the proportion of older adults across all weight groups who consider themselves to be too heavy.

## Introduction

The global obesity epidemic and ageing population are major public health concerns. With excess weight becoming increasingly 'normal', public perceptions of what constitutes a healthy body weight have become more inaccurate over time, with increasing numbers perceiving a body mass index (BMI) in the overweight or obese range ( $\geq 25$  kg/m<sup>2</sup>) to be 'about right'<sup>1</sup>. The numbers of older adults with overweight (BMI 25-29.9 kg/m<sup>2</sup>) and obesity (BMI  $\geq 30$  kg/m<sup>2</sup>) are rising rapidly, due to concurrent increases in the number of adults who reach older age and the proportion who carry excess weight<sup>2-4</sup>. Understanding how older adults perceive their own weight status, and the extent to which this is influenced by their age and health status, is important for informing targeted recommendations and interventions to promote healthy weight in later life.

Older adults' weight perceptions may be influenced by several social and physiological factors. On a societal level, there are strong preferences for slimness in women and lean muscularity in men<sup>5</sup>. Some evidence suggests that older people may be less influenced by, and feel less pressure to attain, cultural body weight ideals<sup>6,7</sup>. Nonetheless, body dissatisfaction is evident in mid- and later life<sup>8-12</sup> and may even increase as age-related changes in body composition widen the discrepancy between ideal and actual body image<sup>13</sup>. Ageing is associated with an increase in fat mass, loss of lean muscle mass, and redistribution of adipose tissue to the abdominal region<sup>14</sup>; changes that may occur without concomitant changes in body weight and BMI<sup>15</sup>.

While few previous studies have examined older adults' weight perceptions, those that have indicate age-related changes in perceptions of body weight in relation to actual BMI category. For example, in a sample of adult Korean women ( $n=8,906$ , age 20-79 years), older women were more likely than younger women to underestimate their weight status relative to their actual BMI category (50.7% of 70-79 year olds vs. 12.6% of 20-29 year olds) and less likely to overestimate their weight status (7.4% vs. 18.7%, respectively)<sup>16</sup>. Similarly, in a study of older Dutch men and women ( $n=1,295$ , age 60-96 years), the proportion of women who underestimated their weight increased with age (OR=2.97, 95% CI 1.59-5.57 for 80-96 year olds vs. 60-69 year olds), although no such pattern was found for men<sup>17</sup>. However, it was not clear from these studies whether these differences are driven by differences between older and younger people, for example relating to health status. Qualitative research suggests at least some older adults believe carrying extra weight could be protective in times of illness<sup>12</sup>, which may mean older people's weight perceptions are influenced by current perceptions of health status or future health concerns.

1  
2  
3 The present study therefore aimed to explore perceptions of weight in a large, nationally-representative  
4 sample of older adults living in England, and the extent to which they differ according to age and perceived  
5 health status.  
6  
7  
8  
9  
10

## 11 **Method**

### 12 **Study population**

13  
14  
15 Data were from the English Longitudinal Study of Ageing (ELSA), a panel study of men and women aged  $\geq 50$   
16 years living in England. Full details of the study's sampling procedure and methods are available elsewhere  
17 <sup>18</sup>. The present analyses use data collected in the eighth wave of ELSA (collected 2016/17), as this is the only  
18 wave in which weight perceptions have been assessed. Of the 8,445 participants interviewed, 5,240 (62.0%)  
19 had complete data on all variables of interest and comprised our analytic sample.  
20  
21  
22  
23  
24  
25

### 26 **Measures**

#### 27 *Weight perception*

28  
29 Weight perception was assessed with the question "Given your age and height, would you say that you are  
30 about the right weight, too heavy, or too light?".  
31  
32  
33  
34  
35

#### 36 *Anthropometric data*

37  
38 Weight was measured by nurses to the nearest 0.1 kg using portable electronic scales. Height was measured  
39 in Wave 6 (it was not included in the Wave 8 assessment) to the nearest millimetre using a portable  
40 stadiometer. Nurses recorded any factors that might have compromised the reliability of the measurements  
41 (e.g. participant was stooped/unwilling to remove shoes) and these cases were excluded. BMI was  
42 calculated as weight in kilograms divided by the square of height in metres, and categorised as underweight  
43 ( $< 18.5$  kg/m<sup>2</sup>), normal-weight (18.5 to  $< 25$  kg/m<sup>2</sup>), overweight (25 to  $< 30$  kg/m<sup>2</sup>) and obese ( $\geq 30$  kg/m<sup>2</sup>). We  
44 excluded participants with a BMI in the underweight range because there were insufficient numbers for  
45 meaningful analysis as a separate group ( $n=64$ , 1.2% of otherwise eligible sample).  
46  
47  
48  
49  
50  
51  
52

53 For some descriptive analyses, normal-weight participants were divided into those with a BMI in the lower  
54 half of the normal-weight range (BMI 18.5 to  $< 21.75$  kg/m<sup>2</sup>; 'lower normal-weight') and those in the upper  
55  
56  
57  
58  
59  
60

1  
2  
3 half (BMI 21.75 to <30 kg/m<sup>2</sup>; 'upper normal-weight') to provide an indication as to the distribution of  
4 participants across the normal-weight range and help interpret associations between BMI and weight  
5 perceptions.  
6  
7

### 8 9 *Sociodemographic information*

10  
11 Information on age, sex, ethnicity (white vs. non-white), and SES was recorded. SES was indexed using the  
12 short version of the NSSEC 3-category classification of the present or most recent occupation and  
13 categorised as higher (managerial/professional occupations), intermediate (intermediate occupations), and  
14 lower (routine/manual occupations)<sup>19</sup>. This measure of SES was chosen for comparability with previous  
15 studies investigating weight perceptions in other age groups in England e.g.<sup>20</sup>.  
16  
17  
18  
19  
20

### 21 *Perceived health and comorbidities*

22  
23 Self-rated health was assessed using a single item: "Would you say your health is... poor/fair/good/very  
24 good/excellent?" We analysed the proportion of individuals rating their health as fair/poor. This dichotomy  
25 is commonly used in analyses of this variable<sup>21-23</sup> to overcome issues relating to the skewed distribution of  
26 responses and provide results that are easily interpreted (i.e. odds of the outcome associated with poorer  
27 versus better health).  
28  
29  
30  
31  
32

33 Information about five doctor-diagnosed chronic diseases that may cause weight loss (cancer, stroke,  
34 chronic lung disease, diabetes, and arthritis) was self-reported and the number of reported conditions were  
35 summed to create a chronic health condition index ranging from 0-5. Because scores were highly skewed,  
36 we dichotomised this variable to distinguish between 0 and ≥1 health conditions.  
37  
38  
39  
40

### 41 **Statistical analysis**

42  
43 Analyses were performed using IBM SPSS Statistics 24. In order to produce representative estimates for  
44 older adults in the English population, data were weighted to correct for sampling probabilities and to  
45 match the English population on age and sex. The weights accounted for the differential probability of being  
46 included in Wave 8 of ELSA.  
47  
48  
49  
50

51 Analyses were performed separately for men and women. We tested sex differences in sociodemographic,  
52 anthropometric, self-rated health, and weight perception variables using *t*-tests for continuous variables  
53 and Pearson's chi-square analyses for categorical variables. We used multivariable logistic regression to  
54  
55  
56  
57  
58  
59  
60

1  
2  
3 identify independent associations with perception of weight as (i) 'too heavy' or (ii) 'too light' among  
4 normal-weight participants, and associations with perception of weight as 'about right' among participants  
5 with overweight or obesity. Variables included in the models were age, ethnicity, SES, self-rated health, and  
6 BMI. In order to evaluate whether perception of weight as too light among normal-weight participants, or  
7 about right among participants with overweight or obesity, was associated with health conditions that may  
8 cause weight loss, we also adjusted for chronic health conditions in each model. Results are reported as  
9 odds ratios (ORs) with 95% confidence intervals (CIs).  
10  
11  
12  
13  
14  
15

### 16 **Patient and public involvement**

17  
18 Patients and the public were not involved in this research.  
19  
20  
21  
22

### 23 **Results**

24  
25  
26 There were 2,352 men and 2,888 women in the sample. Descriptive characteristics overall and by sex are  
27 shown in Table 1. The mean age was 70.1 (SD 7.8) years. The majority of participants were white (96.2%)  
28 and rated their health as good, very good, or excellent (72.7%) despite many having one or more chronic  
29 health conditions (58.0%). There was fairly even distribution across socioeconomic groups (32.4% higher  
30 SES, 26.8% intermediate SES, 40.8% lower SES), although women were less likely than men to be in the  
31 higher SES group (26.6% vs. 38.8%,  $p<0.001$ ). Just over a quarter (27.5%) of participants had a BMI in the  
32 normal-weight range, 40.3% were overweight, and a further 32.3% had obesity. On average, men were  
33 significantly taller and heavier than women ( $p<0.001$ ). While there was no significant sex difference in mean  
34 BMI ( $p=0.116$ ), men were more likely than women to have a BMI placing them in the overweight range  
35 (46.1% vs. 35.0%) while women were more likely than men to have a normal-weight (30.8% vs. 23.8%) or  
36 obese BMI (34.2% vs. 30.1%,  $p<0.001$ ).  
37  
38  
39  
40  
41  
42  
43  
44

### 45 **Weight perception among normal-weight older adults**

46  
47 Figure 1 summarises the distribution of weight perceptions by sex and weight status. In the normal-weight  
48 category, the majority (80.3%) of participants thought they were about the right weight, but 9.9% thought  
49 they were too light, and 9.7% thought they were too heavy. Normal-weight women were significantly more  
50 likely than normal-weight men to consider themselves to be too heavy (12.6% vs. 5.6%,  $p<0.001$ ) and less  
51 likely to consider themselves too light (7.3% vs. 13.7%,  $p<0.001$ ).  
52  
53  
54  
55  
56  
57  
58  
59  
60

1  
2  
3 Multivariable models testing independent associations of age, sex, ethnicity, SES, and BMI with perception  
4 of body weight as too heavy in normal-weight men and women are presented in Table 2 (left panel). There  
5 was a significant independent association between BMI and perception of weight as too heavy in both  
6 sexes, with each unit increase in BMI associated with 1.76 times higher odds (95% CI 1.18-2.61) of  
7 perception of weight as too heavy in men and 2.14 times higher odds (95% CI 1.69-2.72) in women. Some  
8 6.7% of men and 16.8% of women in the upper normal-weight group felt too heavy, compared with just  
9 1.1% of men and 2.5% of women in the lower normal-weight group. Older age was significantly associated  
10 with reduced odds of perception of weight as too heavy in women (OR=0.97, 95% CI 0.94-1.00) but not in  
11 men. There was no significant independent association between perception of weight as too heavy and  
12 ethnicity, SES, or self-rated health in either sex.  
13  
14  
15  
16  
17  
18  
19  
20

21 Factors independently associated with perception of body weight as too light in normal-weight men and  
22 women are shown in Table 2 (right panel). There were strong independent associations with BMI and self-  
23 rated health. In both sexes, odds of feeling too light were significantly lower among those with a higher  
24 BMI, with each unit increase in BMI associated with a 47% reduction in odds in men (OR=0.53, 95% CI 0.43-  
25 0.64) and a 53% reduction in odds in women (OR=0.47, 95% CI 0.38-0.58). Just 6.5% of men and 2.6% of  
26 women in the upper normal-weight group felt too light, compared with 43.3% of men and 17.8% of women  
27 in the lower normal-weight group. Odds of perception of weight as too light were significantly increased  
28 among participants with fair/poor self-rated health (men: OR=3.70, 95% CI 1.88-7.28; women: OR=2.61,  
29 95% CI 1.27-5.35). The presence of one or more chronic health conditions was also independently  
30 associated with increased odds of perception of weight as too light in women (OR=2.21, 95% CI 1.03-4.77)  
31 but not in men. Older age was associated with increased odds of perception of weight as too light in  
32 normal-weight women (OR=1.04, 95% CI 1.01-1.09) but not in men. Non-white ethnicity was associated  
33 with increased odds of perception of weight as too light in normal-weight men (OR=6.26, 95% CI 2.09-18.76)  
34 but not in women. There was no significant independent association with SES in either sex.  
35  
36  
37  
38  
39  
40  
41  
42  
43  
44

#### 45 **Weight perception among older adults with overweight or obesity**

46  
47 Among participants with a BMI in the overweight range, 54.3% thought they were too heavy, but 44.8%  
48 thought they were about the right weight and 0.9% thought they were too light. Among participants with an  
49 obese BMI, 89.4% thought they were too heavy, 10.3% thought they were about the right weight and 0.4%  
50 thought they were too light. Women with overweight were more likely than men with overweight to  
51 recognise that they were too heavy (63.4% vs. 46.7%,  $p<0.001$ ) and less likely to perceive themselves to be  
52 about the right weight (35.7% vs. 52.5%,  $p<.001$ ). Likewise, women with obesity were more likely than men  
53  
54  
55  
56  
57  
58  
59  
60

1  
2  
3 with obesity to perceive their weight as too heavy (91.3% vs. 87.0%,  $p=0.012$ ) and less likely to perceive  
4 their weight as about right (8.5% vs. 12.4%,  $p=0.020$ ) (Figure 1).  
5  
6

7 Factors independently associated with perception of body weight as about right in men and women with  
8 overweight are summarised in Table 3. Among overweight men and women, there was a strong  
9 independent association with BMI: each unit increase in BMI was associated with 48% lower odds of  
10 perception of weight as about right in men (OR=0.52, 95% CI 0.47-0.59) and 45% lower odds in women  
11 (OR=0.55, 95% CI 0.48-0.63). Older age was also independently associated with increased odds of  
12 perception of weight as about right in both sexes (men: OR=1.04, 95% CI 1.02-1.06; women: OR=1.06, 95%  
13 CI 1.04-1.09). Non-white ethnicity was associated with increased odds of perception of weight as about  
14 right in women (OR=3.79, 95% CI 1.44-9.94) but not in men. An association with SES was also observed in  
15 women, with women with overweight in the intermediate and lower SES groups significantly more likely to  
16 perceive their weight to be about right than those from the higher SES group (intermediate: OR=1.78, 95%  
17 CI 1.14-2.79; lower: OR=1.73, 95% CI 1.13-2.66). There was no significant association with SES in men. There  
18 was no significant independent association with self-rated health in either sex, although in men (but not in  
19 women), presence of at least one comorbid health condition was associated with significantly lower odds of  
20 perception of weight as about right (OR=0.56, 95% CI 0.41-0.76).  
21  
22  
23  
24  
25  
26  
27  
28  
29  
30  
31

32 Factors independently associated with perception of body weight as about right in men and women with  
33 obesity are shown in Table 4. Older age was significantly associated with increased odds of perception of  
34 body weight as about right in both men (OR=1.05, 95% CI 1.01-1.09) and women (OR=1.04, 95% CI 1.01-  
35 1.08). Higher BMI was associated with 24% lower odds of perception of body weight as about right in men  
36 (OR=0.76, 95% CI 0.67-0.87) but no significant association with BMI was observed in women. Non-white  
37 ethnicity was significantly associated with increased odds of perception of body weight as about right in  
38 women (OR=2.76, 95% CI 1.03-7.40) but not in men. No significant association between perception of body  
39 weight as about right and SES, self-rated health, or chronic health conditions was observed in either sex.  
40  
41  
42  
43  
44  
45  
46  
47  
48

## 49 Discussion

50  
51  
52 In a large, representative sample of older adults living in England, we found that weight perceptions broadly  
53 corresponded to participants' actual weight status as defined by widely used BMI cut-offs: 80% of older  
54 adults with a BMI in the normal-weight range thought they were about the right weight, and over 50% of  
55  
56  
57  
58  
59  
60



1  
2  
3 older adults with a BMI in the overweight range and almost 90% of those with a BMI in the obese range  
4 thought they were too heavy. However, a substantial number of older adults either under- or overestimated  
5 their weight status relative to their BMI category. One in ten participants with a normal-weight BMI thought  
6 they were too heavy and one in ten thought they were too light. Almost half of participants with an  
7 overweight BMI thought they were about the right weight, as did one in ten of those with an obese BMI.  
8  
9

10  
11  
12 As has been observed in previous research examining weight perceptions in younger samples <sup>1,20,24</sup>, there  
13 were systematic differences between men and women's weight perceptions. Across all BMI categories, men  
14 were consistently more likely than women to underestimate their weight status, and normal-weight women  
15 were more likely than normal-weight men to report feeling too heavy. Within BMI categories, those with a  
16 higher BMI were more likely to perceive themselves to be too heavy and less likely to perceive themselves  
17 to be too light or about right. There were also some differences in weight perceptions by ethnicity and SES,  
18 with people from non-white ethnic groups and intermediate and lower SES groups more likely to  
19 underestimate their weight status, as has been shown previously in younger samples <sup>20,24</sup>, although these  
20 differences were not consistently observed across BMI categories or sexes.  
21  
22  
23  
24  
25  
26  
27

28  
29 Importantly, there were also clear age-related differences in weight perceptions across all BMI categories. In  
30 men and women with an overweight or obese BMI, the odds of feeling about the right weight increased  
31 with advancing age. In women with a normal-weight BMI, the odds of feeling too light increased and the  
32 odds of feeling too heavy decreased with age, although there were no significant differences by age in men.  
33 These findings are suggestive of a higher ideal weight at older ages. This is consistent with previous studies  
34 that have shown people, particularly women, tend to endorse a slightly larger and more curvaceous body  
35 shape as they get older <sup>8,25</sup>. It is possible that older people believe that having an overweight or obese BMI is  
36 not necessarily a bad thing at older ages <sup>12</sup>. Alternatively, as people get older they may give up the effort to  
37 reduce weight at higher BMIs, perhaps because other health issues become more salient for them, or  
38 because they are less interested in self-presentation and striving for a slimmer physique <sup>12</sup>.  
39  
40  
41  
42  
43  
44  
45

46  
47 There was also a significant association between self-rated health and odds of feeling too light among men  
48 and women with a normal-weight BMI. Those who rated their health as fair or poor had around three times  
49 higher odds of feeling too light at a normal-weight BMI than those who rated their health as good, very  
50 good, or excellent. In addition, women with a normal-weight BMI who had at least one chronic condition  
51 were also more likely to consider themselves to be too light, although there was no difference in men.  
52  
53  
54  
55 These results could be interpreted as suggesting that the ideal weight may be higher for older adults in  
56  
57  
58  
59  
60

1  
2  
3 poorer health than for those in good health. There is a vast literature documenting an obesity paradox in  
4 chronic conditions including cardiovascular disease <sup>26</sup>, cancer <sup>27</sup>, kidney disease <sup>28</sup>, and lung disease <sup>29</sup>,  
5 whereby patients who carry excess weight have better outcomes than those with a normal-weight BMI. It  
6 has also been suggested that stress related to negative body image perception may have a causal role in the  
7 development of poor health <sup>30</sup>. An alternative explanation is that the association between poorer self-rated  
8 health and increased likelihood of feeling too light might be secondary to illness. Older people with serious  
9 chronic illnesses often lose weight, so the fact they think they are too light might be a reflection of this  
10 concern.

11  
12  
13  
14  
15  
16  
17  
18 At the upper end of the weight spectrum, health status was less strongly associated with weight  
19 perceptions, with no significant association observed between self-rated health and perception of weight as  
20 about right among those with an overweight or obese BMI. However, men with a BMI in the overweight  
21 range who had at least one comorbid condition had significantly lower odds of feeling their weight was  
22 about right than those who were free of comorbidities, suggesting that experiencing an associated health  
23 problem may make men more likely to recognise their overweight (albeit still less likely than women with or  
24 without a health condition).

25  
26  
27  
28  
29  
30 Taken together, these findings suggest that the discrepancy between perceived weight status and BMI-  
31 based definitions of weight status is greater among people who are older or in poorer health. The  
32 appropriateness of conventional BMI definitions of weight status for older people is an issue of ongoing  
33 debate in the literature <sup>31-35</sup>. Currently, guidance issued by official bodies such as the UK National Health  
34 Service <sup>36</sup> and US Centers for Disease Control and Prevention <sup>37</sup> does not differ according to age group or  
35 health status. However, many health professionals are reluctant to recommend weight loss for older  
36 patients with an overweight BMI <sup>38,39</sup> and there have been calls to reconsider the standards for ideal weight  
37 at older ages and develop age-specific recommendations <sup>40-42</sup>. The present results show that for the  
38 majority of older people, weight perceptions map onto BMI definitions of weight status. Further research is  
39 needed to establish whether for the remainder, the mismatch between perceived weight and BMI status  
40 represents a lack of awareness of 'healthy' weight, preference for higher weight in older age, or reflects a  
41 genuine biological advantage to being heavier in older age (the so-called 'obesity paradox' <sup>35</sup>).

42  
43  
44  
45  
46  
47  
48  
49  
50  
51 Strengths of the present study include the large sample size and objective measurements of height and  
52 weight. However, findings should be considered in the light of several limitations. There was a substantial  
53 amount of missing data, so findings may not generalise to the entire population. Of note, weight  
54  
55  
56  
57  
58  
59  
60

1  
2  
3 measurements were not available for all Wave 8 participants (8% missing). If those who were more  
4 concerned about their weight were more likely to decline to be measured, our results may underestimate  
5 the proportion of older adults across all weight groups who consider themselves to be too heavy. In  
6 addition, no data were collected on participants' weight history, which could potentially influence their  
7 current perceptions of their body weight (for example, individuals with a higher average lifetime BMI or  
8 history of overweight or obesity may be more likely to incorrectly perceive themselves to be 'too light' or  
9 'about right' in older age).  
10  
11  
12  
13  
14  
15

16 In conclusion, the present results indicate that older adults' perceptions of their own weight generally  
17 correspond with traditional BMI cut-offs for normal-weight, overweight, and obesity. However, a substantial  
18 minority 'underestimate' their weight status, with those at the upper end of the age spectrum and those in  
19 poorer health more likely to do so.  
20  
21  
22  
23  
24  
25  
26  
27  
28  
29  
30  
31  
32  
33  
34  
35  
36  
37  
38  
39  
40  
41  
42  
43  
44  
45  
46  
47  
48  
49  
50  
51  
52  
53  
54  
55  
56  
57  
58  
59  
60

## References

1. Johnson F, Cooke L, Croker H, Wardle J. Changing perceptions of weight in Great Britain: comparison of two population surveys. *BMJ*. 2008;337(jul10 1):a494-a494. doi:10.1136/bmj.a494
2. Vincent GK, Velkoff VA. *The next Four Decades: The Older Population in the United States: 2010 to 2050*. US Department of Commerce, Economics and Statistics Administration, US Census Bureau; 2010.
3. Wang YC, McPherson K, Marsh T, Gortmaker SL, Brown M. Health and economic burden of the projected obesity trends in the USA and the UK. *The Lancet*. 2011;378(9793):815-825. doi:10.1016/S0140-6736(11)60814-3
4. Villareal DT, Apovian CM, Kushner RF, Klein S. Obesity in Older Adults: Technical Review and Position Statement of the American Society for Nutrition and NAASO, The Obesity Society. *Obes Res*. 2005;13(11):1849-1863. doi:10.1038/oby.2005.228
5. Swami V. Cultural Influences on Body Size Ideals. *Eur Psychol*. 2015;20(1):44-51. doi:10.1027/1016-9040/a000150
6. Bedford JL, Johnson CS. Societal Influences on Body Image Dissatisfaction in Younger and Older Women. *J Women Aging*. 2006;18(1):41-55. doi:10.1300/J074v18n01\_04
7. Dunkel TM, Davidson D, Qurashi S. Body satisfaction and pressure to be thin in younger and older Muslim and non-Muslim women: The role of Western and non-Western dress preferences. *Body Image*. 2010;7(1):56-65. doi:10.1016/j.bodyim.2009.10.003
8. Tiggemann M. Body image across the adult life span: stability and change. *Body Image*. 2004;1(1):29-41. doi:10.1016/S1740-1445(03)00002-0
9. Webster J, Tiggemann M. The Relationship Between Women's Body Satisfaction and Self-Image Across the Life Span: The Role of Cognitive Control. *J Genet Psychol*. 2003;164(2):241-252. doi:10.1080/00221320309597980
10. Lamb CS, Jackson LA, Cassiday PB, Priest DJ. Body figure preferences of men and women: A comparison of two generations. *Sex Roles*. 1993;28(5-6):345-358. doi:10.1007/BF00289890
11. Rozin P, Fallon A. Body image, attitudes to weight, and misperceptions of figure preferences of the opposite sex: a comparison of men and women in two generations. *J Abnorm Psychol*. 1988;97(3):342-345.
12. Jackson SE, Holter L, Beeken RJ. 'Just because I'm old it doesn't mean I have to be fat': a qualitative study exploring older adults' views and experiences of weight management. *BMJ Open*. 2019;9(2):e025680. doi:10.1136/bmjopen-2018-025680
13. Tiggemann M. Body-size dissatisfaction: Individual differences in age and gender, and relationship with self-esteem. *Personal Individ Differ*. 1992;13(1):39-43. doi:10.1016/0191-8869(92)90215-B

14. St-Onge M-P, Gallagher D. Body composition changes with aging: The cause or the result of alterations in metabolic rate and macronutrient oxidation? *Nutr Burbank Los Angel Cty Calif*. 2010;26(2):152-155. doi:10.1016/j.nut.2009.07.004
15. St-Onge M-P. Relationship between body composition changes and changes in physical function and metabolic risk factors in aging. *Curr Opin Clin Nutr Metab Care*. 2005;8(5):523-528.
16. Park B, Cho HN, Choi E, et al. Self-perceptions of body weight status according to age-groups among Korean women: A nationwide population-based survey. *PLOS ONE*. 2019;14(1):e0210486. doi:10.1371/journal.pone.0210486
17. Monteagudo Sánchez C, Dijkstra SC, Visser M. Self-perception of body weight status in older Dutch adults. *J Nutr Health Aging*. 2015;19(6):612-618. doi:10.1007/s12603-015-0486-z
18. Steptoe A, Breeze E, Banks J, Nazroo J. Cohort profile: the English Longitudinal Study of Ageing. *Int J Epidemiol*. 2013;42(6):1640-1648. doi:10.1093/ije/dys168
19. Rose D, Pevalin DJ. *A Researcher's Guide to the National Statistics Socio-Economic Classification*. SAGE Publications Ltd; 2003.
20. Jackson SE, Johnson F, Croker H, Wardle J. Weight perceptions in a population sample of English adolescents: cause for celebration or concern? *Int J Obes*. 2015;39(10):1488-1493. doi:10.1038/ijo.2015.126
21. Steptoe A, Jackson SE. The Life Skills of Older Americans: Association with Economic, Psychological, Social, and Health Outcomes. *Sci Rep*. 2018;8(1):9669. doi:10.1038/s41598-018-27909-w
22. DeSalvo KB, Bloser N, Reynolds K, He J, Muntner P. Mortality prediction with a single general self-rated health question. A meta-analysis. *J Gen Intern Med*. 2006;21(3):267-275. doi:10.1111/j.1525-1497.2005.00291.x
23. Jackson SE, Hackett RA, Steptoe A. Associations between age discrimination and health and wellbeing: cross-sectional and prospective analysis of the English Longitudinal Study of Ageing. *Lancet Public Health*. 2019;in press.
24. Yaemsiri S, Slining MM, Agarwal SK. Perceived weight status, overweight diagnosis, and weight control among US adults: the NHANES 2003–2008 Study. *Int J Obes*. 2011;35(8):1063-1070. doi:10.1038/ijo.2010.229
25. Clarke LCH. Beauty in Later Life: Older Women's Perceptions of Physical Attractiveness. *Can J Aging Rev Can Vieil*. 2002;21(3):429-442. doi:10.1017/S0714980800001744
26. Lavie CJ, Milani RV, Ventura HO. Obesity and the "Obesity Paradox" in Cardiovascular Diseases. *Clin Pharmacol Ther*. 2011;90(1):23-25. doi:10.1038/clpt.2011.87
27. Lennon H, Sperrin M, Badrick E, Renehan AG. The Obesity Paradox in Cancer: a Review. *Curr Oncol Rep*. 2016;18(9):56. doi:10.1007/s11912-016-0539-4

- 1
  - 2
  - 3
  - 4
  - 5
  - 6
  - 7
  - 8
  - 9
  - 10
  - 11
  - 12
  - 13
  - 14
  - 15
  - 16
  - 17
  - 18
  - 19
  - 20
  - 21
  - 22
  - 23
  - 24
  - 25
  - 26
  - 27
  - 28
  - 29
  - 30
  - 31
  - 32
  - 33
  - 34
  - 35
  - 36
  - 37
  - 38
  - 39
  - 40
  - 41
  - 42
  - 43
  - 44
  - 45
  - 46
  - 47
  - 48
  - 49
  - 50
  - 51
  - 52
  - 53
  - 54
  - 55
  - 56
  - 57
  - 58
  - 59
  - 60
28. Park J, Ahmadi S-F, Streja E, et al. Obesity Paradox in End-Stage Kidney Disease Patients. *Prog Cardiovasc Dis*. 2014;56(4):415-425. doi:10.1016/j.pcad.2013.10.005
29. Chittal P, Babu AS, Lavie CJ. Obesity Paradox: Does Fat Alter Outcomes in Chronic Obstructive Pulmonary Disease? *COPD J Chronic Obstr Pulm Dis*. 2015;12(1):14-18. doi:10.3109/15412555.2014.915934
30. Muennig P, Jia H, Lee R, Lubetkin E. I Think Therefore I Am: Perceived Ideal Weight as a Determinant of Health. *Am J Public Health*. 2008;98(3):501-506. doi:10.2105/AJPH.2007.114769
31. Beck AM, Ovesen L. At which body mass index and degree of weight loss should hospitalized elderly patients be considered at nutritional risk? *Clin Nutr Edinb Scotl*. 1998;17(5):195-198.
32. Sardinha LB, Teixeira PJ. Obesity screening in older women with the body mass index: A receiver operating characteristic (ROC) analysis. *Sci Sports*. 2000;15(4):212-219. doi:10.1016/S0765-1597(00)80008-8
33. Cook Z, Kirk S, Lawrenson S, Sandford S. Use of BMI in the assessment of undernutrition in older subjects: reflecting on practice. *Proc Nutr Soc*. 2005;64(3):313-317. doi:10.1079/PNS2005437
34. Vasconcelos F de AG de, Cordeiro BA, Rech CR, Petroski EL. Sensitivity and specificity of the body mass index for the diagnosis of overweight/obesity in elderly. *Cad Saúde Pública*. 2010;26:1519-1527. doi:10.1590/S0102-311X2010000800006
35. Oreopoulos A, Kalantar-Zadeh K, Sharma AM, Fonarow GC. The Obesity Paradox in the Elderly: Potential Mechanisms and Clinical Implications. *Clin Geriatr Med*. 2009;25(4):643-659. doi:10.1016/j.cger.2009.07.005
36. NHS Digital. Healthy weight. nhs.uk. <https://www.nhs.uk/live-well/healthy-weight/>. Published March 17, 2019. Accessed March 17, 2019.
37. Centers for Disease Control and Prevention. Assessing Your Weight | Healthy Weight. <https://www.cdc.gov/healthyweight/assessing/index.html>. Published March 6, 2019. Accessed March 17, 2019.
38. Houston DK, Nicklas BJ, Zizza CA. Weighty Concerns: The Growing Prevalence of Obesity among Older Adults. *J Am Diet Assoc*. 2009;109(11):1886-1895. doi:10.1016/j.jada.2009.08.014
39. Sommers A. U.S. Congressional Research Service: obesity among older Americans. 2011. [http://www.legistorm.com/score\\_crs/show/id/104646.html](http://www.legistorm.com/score_crs/show/id/104646.html). Accessed April 18, 2013.
40. Andres R, Elahi D, Tobin JD, Muller DC, Brant L. Impact of age on weight goals. *Ann Intern Med*. 1985;103(6 ( Pt 2)):1030-1033.
41. Heiat A. Impact of Age on Definition of Standards for Ideal Weight. *Prev Cardiol*. 2003;6(2):104-107. doi:10.1111/j.1520-037X.2003.01046.x
42. DeCaria JE, Sharp C, Petrella RJ. Scoping review report: obesity in older adults. *Int J Obes*. March 2012. doi:10.1038/ijo.2012.29

1  
2  
3  
4  
5  
6  
7  
8  
9  
10  
11  
12  
13  
14  
15  
16  
17  
18  
19  
20  
21  
22  
23  
24  
25  
26  
27  
28  
29  
30  
31  
32  
33  
34  
35  
36  
37  
38  
39  
40  
41  
42  
43  
44  
45  
46  
47  
48  
49  
50  
51  
52  
53  
54  
55  
56  
57  
58  
59  
60

For peer review only

## Funding

This work was supported by Cancer Research UK (C1417/A22962) and the ESRC (ES/R005990/1). The funders had no final role in the study design; in the collection, analysis and interpretation of data; in the writing of the report; or in the decision to submit the paper for publication. All researchers listed as authors are independent from the funders and all final decisions about the research were taken by the investigators and were unrestricted. All authors had full access to all of the data (including statistical reports and tables) in the study and can take responsibility for the integrity of the data and the accuracy of the data analysis.

For peer review only



1  
2  
3 **Acknowledgments**  
4

5  
6 **Authors' contributions**  
7

8  
9 SEJ analysed the data and drafted the manuscript. LS and AS provided critical revisions and approved the  
10 final manuscript.  
11

12  
13 **Availability of data and materials**  
14

15  
16 The raw ELSA data are available from the UK Data Service.  
17

18  
19 **Competing interests**  
20

21 None.  
22  
23  
24  
25  
26  
27  
28  
29  
30  
31  
32  
33  
34  
35  
36  
37  
38  
39  
40  
41  
42  
43  
44  
45  
46  
47  
48  
49  
50  
51  
52  
53  
54  
55  
56  
57  
58  
59  
60

## Tables

**Table 1** Sample demographic and anthropometric characteristics

|                                    | <b>Whole sample<br/>(n=5240)</b> | <b>Men<br/>(n=2352)</b> | <b>Women<br/>(n=2888)</b> | <b>p*</b> |
|------------------------------------|----------------------------------|-------------------------|---------------------------|-----------|
| Age (mean [SD] years)              | 70.07 (7.76)                     | 70.23 (7.52)            | 70.57 (7.71)              | 0.117     |
| Ethnicity                          |                                  |                         |                           |           |
| White                              | 96.2                             | 95.8                    | 96.6                      | 0.163     |
| Non-white                          | 3.8                              | 4.2                     | 3.4                       | -         |
| SES                                |                                  |                         |                           |           |
| Higher                             | 32.4                             | 38.8                    | 26.6                      | <0.001    |
| Intermediate                       | 26.8                             | 21.9                    | 31.3                      | -         |
| Lower                              | 40.8                             | 39.4                    | 42.2                      | -         |
| Self-rated health                  |                                  |                         |                           |           |
| Good/very good/excellent           | 72.7                             | 72.5                    | 72.9                      | 0.790     |
| Fair/poor                          | 27.3                             | 27.5                    | 27.1                      | -         |
| Chronic health conditions          |                                  |                         |                           |           |
| None                               | 42.0                             | 46.2                    | 38.1                      | <0.001    |
| ≥1                                 | 58.0                             | 53.8                    | 61.9                      | -         |
| Height (mean [SD] cm)              | 166.31 (9.44)                    | 173.10 (6.90)           | 160.01 (6.66)             | <0.001    |
| Weight (mean [SD] kg)              | 78.64 (16.35)                    | 84.59 (15.04)           | 72.81 (15.29)             | <0.001    |
| BMI (mean [SD] kg/m <sup>2</sup> ) | 28.39 (5.28)                     | 28.21 (4.61)            | 28.45 (5.76)              | 0.116     |
| Weight status                      |                                  |                         |                           |           |
| Normal-weight                      | 27.5                             | 23.8                    | 30.8                      | <0.001    |
| Lower normal-weight                | 7.1                              | 4.7                     | 9.2                       | -         |
| Upper normal-weight                | 20.4                             | 19.1                    | 21.5                      | -         |
| Overweight                         | 40.3                             | 46.1                    | 35.0                      | -         |
| Obese                              | 32.3                             | 30.1                    | 34.2                      | -         |

Weighted means and proportions are shown. Sample sizes (*n*) are shown unweighted.

\**p* values are for the association between each variable and sex.

SD = standard deviation; SES = socioeconomic status; BMI = body mass index.

**Table 2** Multivariable models testing associations with feeling ‘too heavy’ and ‘too light’ among normal-weight older men and women

|                           | Too heavy   |                  |       |               |                  |        | Too light   |                   |        |               |                   |        |
|---------------------------|-------------|------------------|-------|---------------|------------------|--------|-------------|-------------------|--------|---------------|-------------------|--------|
|                           | Men (n=581) |                  |       | Women (n=917) |                  |        | Men (n=581) |                   |        | Women (n=917) |                   |        |
|                           | %*          | OR [95% CI]      | p     | %*            | OR [95% CI]      | p      | %*          | OR [95% CI]       | p      | %*            | OR [95% CI]       | p      |
| Age (years)               | -           | 1.01 [0.96-1.06] | 0.717 | -             | 0.97 [0.94-1.00] | 0.049  | -           | 1.01 [0.97-1.05]  | 0.745  | -             | 1.04 [1.00-1.09]  | 0.042  |
| Ethnicity                 |             |                  |       |               |                  |        |             |                   |        |               |                   |        |
| White                     | 5.7         | 1.00             | -     | 12.6          | 1.00             | -      | 12.2        | 1.00              | -      | 7.1           | 1.00              | -      |
| Non-white                 | 4.8         | 0.94 [0.14-6.55] | 0.952 | 9.5           | 0.42 [0.09-1.89] | 0.258  | 42.9        | 6.26 [2.09-18.76] | 0.001  | 9.5           | 1.96 [0.36-10.82] | 0.440  |
| SES                       |             |                  |       |               |                  |        |             |                   |        |               |                   |        |
| Higher                    | 5.4         | 1.00             | -     | 11.9          | 1.00             | -      | 10.3        | 1.00              | -      | 3.7           | 1.00              | -      |
| Intermediate              | 7.8         | 1.40 [0.53-3.71] | 0.504 | 12.5          | 1.18 [0.64-2.17] | 0.605  | 10.7        | 0.84 [0.36-1.96]  | 0.689  | 9.3           | 2.26 [0.87-5.86]  | 0.093  |
| Lower                     | 5.1         | 1.03 [0.40-2.70] | 0.948 | 13.4          | 1.26 [0.69-2.31] | 0.457  | 19.7        | 1.30 [0.64-2.64]  | 0.474  | 8.9           | 2.15 [0.83-5.57]  | 0.114  |
| Self-rated health         |             |                  |       |               |                  |        |             |                   |        |               |                   |        |
| Good/very good/excellent  | 5.6         | 1.00             | -     | 13.1          | 1.00             | -      | 8.2         | 1.00              | -      | 4.8           | 1.00              | -      |
| Fair/poor                 | 5.8         | 1.17 [0.47-2.92] | 0.730 | 9.9           | 0.88 [0.45-1.72] | 0.717  | 29.2        | 3.70 [1.88-7.28]  | <0.001 | 17.6          | 2.61 [1.27-5.35]  | 0.009  |
| BMI                       | -           | 1.76 [1.18-2.61] | 0.005 | -             | 2.14 [1.69-2.72] | <0.001 | -           | 0.53 [0.43-0.64]  | <0.001 | -             | 0.47 [0.38-0.58]  | <0.001 |
| Chronic health conditions |             |                  |       |               |                  |        |             |                   |        |               |                   |        |
| None                      | -           | -                | -     | -             | -                | -      | 10.0        | 1.00              | -      | 4.3           | 1.00              | -      |
| ≥1                        | -           | -                | -     | -             | -                | -      | 17.3        | 1.07 [0.54-2.14]  | 0.840  | 10.0          | 2.21 [1.03-4.77]  | 0.043  |

\*Indicates the percentage of normal-weight participants in each group perceiving themselves to be too heavy/too light.

OR = odds ratio; CI = confidence interval; SES = socioeconomic status; BMI = body mass index.

Weighted data. Sample sizes (n) are shown unweighted.

**Table 3** Multivariable models testing associations with feeling ‘about the right weight’ among older men and women with overweight

|                           | Men (n=1083) |                  |        | Women (n=1052) |                  |        |
|---------------------------|--------------|------------------|--------|----------------|------------------|--------|
|                           | %*           | OR [95% CI]      | p      | %*             | OR [95% CI]      | p      |
| Age (years)               | -            | 1.04 [1.02-1.06] | <0.001 | -              | 1.06 [1.04-1.09] | <0.001 |
| Ethnicity                 |              |                  |        |                |                  |        |
| White                     | 52.7         | 1.00             | -      | 34.9           | 1.00             | -      |
| Non-white                 | 48.8         | 1.77 [0.87-3.59] | 0.115  | 61.9           | 3.79 [1.44-9.94] | 0.007  |
| SES                       |              |                  |        |                |                  |        |
| Higher                    | 53.5         | 1.00             | -      | 28.9           | 1.00             | -      |
| Intermediate              | 54.4         | 1.22 [0.83-1.81] | 0.313  | 37.5           | 1.78 [1.14-2.79] | 0.011  |
| Lower                     | 50.4         | 1.14 [0.81-1.59] | 0.458  | 38.1           | 1.73 [1.13-2.66] | 0.013  |
| Self-rated health         |              |                  |        |                |                  |        |
| Good/very good/excellent  | 54.3         | 1.00             | -      | 34.1           | 1.00             | -      |
| Fair/poor                 | 46.4         | 0.93 [0.65-1.33] | 0.688  | 40.3           | 1.26 [0.84-1.89] | 0.273  |
| BMI                       | -            | 0.52 [0.47-0.59] | <0.001 | -              | 0.55 [0.48-0.63] | <0.001 |
| Chronic health conditions |              |                  |        |                |                  |        |
| None                      | 58.8         | 1.00             | -      | 32.6           | 1.00             | -      |
| ≥1                        | 45.8         | 0.56 [0.41-0.76] | <0.001 | 37.4           | 1.08 [0.76-1.55] | 0.659  |

\*Indicates the percentage of overweight participants in each group perceiving themselves to be about the right weight or too light.

OR = odds ratio; CI = confidence interval; SES = socioeconomic status.

Weighted data. Sample sizes (n) are shown unweighted.

**Table 4** Multivariable models testing associations with feeling 'about the right weight' among older men and women with obesity

|                           | Men (n=688) |                  |        | Women (n=919) |                  |       |
|---------------------------|-------------|------------------|--------|---------------|------------------|-------|
|                           | %*          | OR [95% CI]      | p      | %*            | OR [95% CI]      | p     |
| Age (years)               | -           | 1.05 [1.01-1.09] | 0.013  | -             | 1.04 [1.01-1.08] | 0.012 |
| Ethnicity                 |             |                  |        |               |                  |       |
| White                     | 12.7        | 1.00             | -      | 8.1           | 1.00             | -     |
| Non-white                 | 5.3         | 0.32 [0.04-2.48] | 0.278  | 20.7          | 2.76 [1.03-7.40] | 0.043 |
| SES                       |             |                  |        |               |                  |       |
| Higher                    | 11.1        | 1.00             | -      | 8.0           | 1.00             | -     |
| Intermediate              | 11.8        | 0.96 [0.46-1.98] | 0.901  | 4.5           | 0.56 [0.23-1.34] | 0.190 |
| Lower                     | 13.8        | 1.34 [0.74-2.43] | 0.343  | 11.0          | 1.46 [0.74-2.87] | 0.272 |
| Self-rated health         |             |                  |        |               |                  |       |
| Good/very good/excellent  | 13.1        | 1.00             | -      | 8.3           | 1.00             | -     |
| Fair/poor                 | 11.3        | 0.98 [0.55-1.75] | 0.935  | 9.2           | 1.01 [0.56-1.83] | 0.968 |
| BMI                       | -           | 0.76 [0.67-0.87] | <0.001 | -             | 0.96 [0.90-1.03] | 0.269 |
| Chronic health conditions |             |                  |        |               |                  |       |
| None                      | 13.9        | 1.00             | -      | 8.6           | 1.00             | -     |
| ≥1                        | 11.6        | 0.84 [0.48-1.47] | 0.541  | 8.5           | 0.81 [0.43-1.52] | 0.509 |

\*Indicates the percentage of overweight participants in each group perceiving themselves to be about the right weight or too light.

OR = odds ratio; CI = confidence interval; SES = socioeconomic status.

Weighted data. Sample sizes (n) are shown unweighted.

1  
2  
3  
4  
5  
6  
7  
8  
9  
10  
11  
12  
13  
14  
15  
16  
17  
18  
19  
20  
21  
22  
23  
24  
25  
26  
27  
28  
29  
30  
31  
32  
33  
34  
35  
36  
37  
38  
39  
40  
41  
42  
43  
44  
45  
46  
47  
48  
49  
50  
51  
52  
53  
54  
55  
56  
57  
58  
59  
60

## Figure legends

**Figure 1.** The proportion (with 95% confidence interval) of men and women who reported feeling ‘too heavy’, ‘about the right weight’, and ‘too light’, by measured weight status. Weighted data shown.

For peer review only

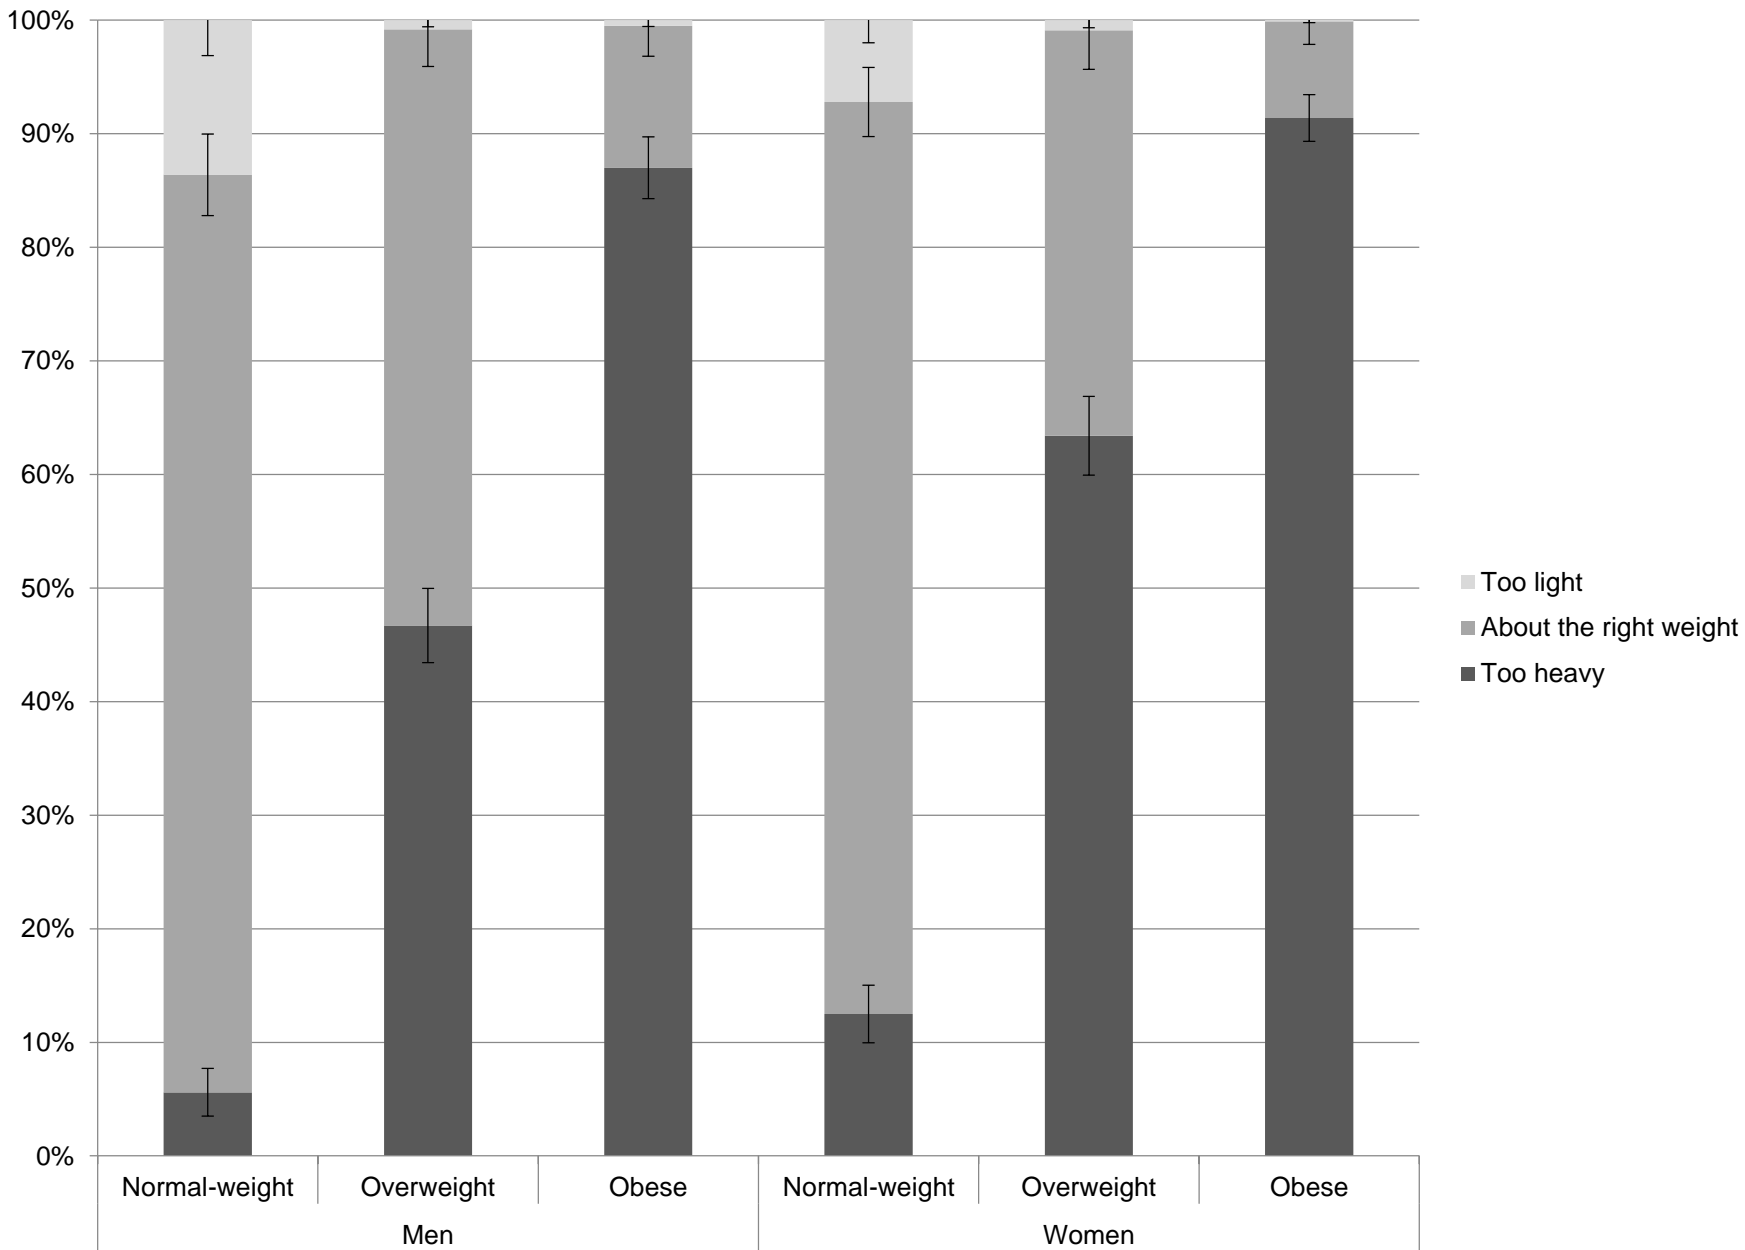

1  
2  
3  
4  
5  
6  
7  
8  
9  
10  
11  
12  
13  
14  
15  
16  
17  
18  
19  
20  
21  
22  
23  
24  
25  
26  
27  
28  
29  
30  
31  
32  
33  
34  
35  
36  
37  
38  
39  
40  
41

STROBE Statement—Checklist of items that should be included in reports of *cross-sectional studies*

|                              | Item No | Recommendation                                                                                                                                                                                               | Page No |
|------------------------------|---------|--------------------------------------------------------------------------------------------------------------------------------------------------------------------------------------------------------------|---------|
| <b>Title and abstract</b>    | 1       | (a) Indicate the study's design with a commonly used term in the title or the abstract                                                                                                                       | 2       |
|                              |         | (b) Provide in the abstract an informative and balanced summary of what was done and what was found                                                                                                          | 2       |
| <b>Introduction</b>          |         |                                                                                                                                                                                                              |         |
| Background/rationale         | 2       | Explain the scientific background and rationale for the investigation being reported                                                                                                                         | 4-5     |
| Objectives                   | 3       | State specific objectives, including any prespecified hypotheses                                                                                                                                             | 5       |
| <b>Methods</b>               |         |                                                                                                                                                                                                              |         |
| Study design                 | 4       | Present key elements of study design early in the paper                                                                                                                                                      | 5       |
| Setting                      | 5       | Describe the setting, locations, and relevant dates, including periods of recruitment, exposure, follow-up, and data collection                                                                              | 5       |
| Participants                 | 6       | (a) Give the eligibility criteria, and the sources and methods of selection of participants                                                                                                                  | 5       |
| Variables                    | 7       | Clearly define all outcomes, exposures, predictors, potential confounders, and effect modifiers. Give diagnostic criteria, if applicable                                                                     | 5-6     |
| Data sources/<br>measurement | 8*      | For each variable of interest, give sources of data and details of methods of assessment (measurement). Describe comparability of assessment methods if there is more than one group                         | 5-6     |
| Bias                         | 9       | Describe any efforts to address potential sources of bias                                                                                                                                                    | 6-7     |
| Study size                   | 10      | Explain how the study size was arrived at                                                                                                                                                                    | 5       |
| Quantitative variables       | 11      | Explain how quantitative variables were handled in the analyses. If applicable, describe which groupings were chosen and why                                                                                 | 5-6     |
| Statistical methods          | 12      | (a) Describe all statistical methods, including those used to control for confounding                                                                                                                        | 6-7     |
|                              |         | (b) Describe any methods used to examine subgroups and interactions                                                                                                                                          | 6-7     |
|                              |         | (c) Explain how missing data were addressed                                                                                                                                                                  | 6-7     |
|                              |         | (d) If applicable, describe analytical methods taking account of sampling strategy                                                                                                                           | 6       |
|                              |         | (e) Describe any sensitivity analyses                                                                                                                                                                        | na      |
| <b>Results</b>               |         |                                                                                                                                                                                                              |         |
| Participants                 | 13*     | (a) Report numbers of individuals at each stage of study—eg numbers potentially eligible, examined for eligibility, confirmed eligible, included in the study, completing follow-up, and analysed            | 5       |
|                              |         | (b) Give reasons for non-participation at each stage                                                                                                                                                         | Na      |
|                              |         | (c) Consider use of a flow diagram                                                                                                                                                                           | Na      |
| Descriptive data             | 14*     | (a) Give characteristics of study participants (eg demographic, clinical, social) and information on exposures and potential confounders                                                                     | 7       |
|                              |         | (b) Indicate number of participants with missing data for each variable of interest                                                                                                                          | Tables  |
| Outcome data                 | 15*     | Report numbers of outcome events or summary measures                                                                                                                                                         | Tables  |
| Main results                 | 16      | (a) Give unadjusted estimates and, if applicable, confounder-adjusted estimates and their precision (eg, 95% confidence interval). Make clear which confounders were adjusted for and why they were included | Tables  |



|                          |    |                                                                                                                                                                            |        |
|--------------------------|----|----------------------------------------------------------------------------------------------------------------------------------------------------------------------------|--------|
|                          |    | (b) Report category boundaries when continuous variables were categorized                                                                                                  | Tables |
|                          |    | (c) If relevant, consider translating estimates of relative risk into absolute risk for a meaningful time period                                                           | Na     |
| Other analyses           | 17 | Report other analyses done—eg analyses of subgroups and interactions, and sensitivity analyses                                                                             | na     |
| <b>Discussion</b>        |    |                                                                                                                                                                            |        |
| Key results              | 18 | Summarise key results with reference to study objectives                                                                                                                   | 9-10   |
| Limitations              | 19 | Discuss limitations of the study, taking into account sources of potential bias or imprecision. Discuss both direction and magnitude of any potential bias                 | 11     |
| Interpretation           | 20 | Give a cautious overall interpretation of results considering objectives, limitations, multiplicity of analyses, results from similar studies, and other relevant evidence | 11-12  |
| Generalisability         | 21 | Discuss the generalisability (external validity) of the study results                                                                                                      | 11     |
| <b>Other information</b> |    |                                                                                                                                                                            |        |
| Funding                  | 22 | Give the source of funding and the role of the funders for the present study and, if applicable, for the original study on which the present article is based              | 17     |

\*Give information separately for exposed and unexposed groups.

**Note:** An Explanation and Elaboration article discusses each checklist item and gives methodological background and published examples of transparent reporting. The STROBE checklist is best used in conjunction with this article (freely available on the Web sites of PLoS Medicine at <http://www.plosmedicine.org/>, Annals of Internal Medicine at <http://www.annals.org/>, and Epidemiology at <http://www.epidem.com/>). Information on the STROBE Initiative is available at [www.strobe-statement.org](http://www.strobe-statement.org).
